# Supplementary material for: Cross-Linking Cellular Prion Protein Induces Neuronal Type 2-Like Hypersensitivity
Source: PubMed Central journal article supplement (PMC8361482; doi:10.3389/fimmu.2021.639008), 2021-07-30
Supplement: DataSheet_1.pdf [file DataSheet_1.pdf]

## Supplementary Files

**S1. Supplementary methods:** Methods related to the predictions of the 3-dimensional structure of the human PrP<sup>C</sup>; prediction of linear and conformational B cell epitopes; and prediction of toxicity and allergenicity of the linear B cell epitopes.

**Prediction and Validation of the Three-dimensional Structure of the Human Major Prion Protein:** The I-TASSER server (<https://zhanglab.ccmb.med.umich.edu/I-TASSER/>) (1) was used to predict the three-dimensional (3D) structure of the full-length (253 amino acid) huPrP. I-TASSER is a hierarchical template-based protein three-dimensional structure prediction server which uses the query protein sequence and predicts the structure through multiple threading alignments, iterative structure assembly simulations, and comparative functional modelling approaches using state-of-art algorithms (1). The best protein model can be selected based on the template modelling score (TM-score), confidence score (C-score), and root mean square deviation (RMSD) score (1). The predicted structure was visualized using the PyMOL v2.3 (The PyMOL Molecular Graphics System, Version 2.3 Schrödinger, LLC.).

The predicted 3D structure was primarily evaluated based on the Ramachandran plot (2) in PROCHECK (3) that shows mainly most favoured region, additionally allowed regions, and the disallowed regions of the protein structure that was predicted by the PDBsum server (<http://www.ebi.ac.uk/pdbsum>) (3). The protein 3D model was further assessed by the ProSA (<https://prosa.services.came.sbg.ac.at/prosa.php>), a web server that can recognize the errors of the theoretical protein model and calculates the overall quality of the protein 3D model (4). The SAVES v5.0 server (<https://servicesn.mbi.ucla.edu/SAVES/>) was used for the Verify3D score of the protein model (5). Verify3D determines the compatibility of an atomic model (3D) with its own amino acid sequence (1D) by assigning a structural class based on its location and environment (alpha, beta, loop, polar, nonpolar) and comparing the results to good structures (5).

**Prediction of Linear and conformational B Cell epitopes in the Human Major Prion Protein:** The linear and conformational or discontinuous B Cell epitopes in the huPrP 3D structure were predicted using the Ellipro server (<http://tools.iedb.org/ellipro/>) (6). Ellipro is a web-server which uses the geometrical properties of the protein structure in combination with MODELLER program and residue clustering algorithm for the prediction of the B Cell epitopes in the protein region protruding from the protein's globular surface (6). We used the default parameters (minimum score 0.5 and maximum distance 0.6Å) of the Ellipro server for the prediction of both linear and conformational B Cell epitopes.

**Prediction of the Toxicity and Allergenicity of the Linear B Cell epitopes:** We used ToxinPred server (<http://crdd.osdd.net/raghava/toxinpred/>) (7) for the prediction of toxic/non-toxic nature of the linear B Cell epitopes identified the Ellipro server as described above. We used both the support vector machine (SVM) and quantitative matrix (QM) method in ToxinPred server for non-toxic epitope selection. The ToxinPred server has been developed based on the QM and machine learning technique using different properties of the peptides for the prediction of toxicity or non-toxicity of the peptides with 93.92% and 88.00% accuracy in SVM and QM methods, respectively. This server can also be used to identify the most toxic regions in the protein sequence (7).

For the allergenicity prediction, we used *k* nearest neighbours (kNN) method based server AllerTOP v2.0 (<http://www.ddg-pharmfac.net/AllerTOP/>) (8) and a novel alignment-free descriptor-based fingerprint approach server AllergenFP v1.0 (<http://www.ddg-pharmfac.net/AllergenFP/>) (9). The AllergenFP v1.0 server predicts the allergenicity and non-

allergenicity with an accuracy of 88.00% by analysing the key amino acid features such as  $\beta$ -strand, helix, hydrophobicity forming propensities, size, and relative abundance of the amino acids (9). Further, AllerTOP v2.0 server shows 88.7% overall accuracy and uses auto and cross-covariance, machine learning approach and a *k*NN method for the classification of allergen and non-allergen proteins and peptides (8).

## References

1. Roy A, Kucukural A, Zhang Y. I-TASSER: a unified platform for automated protein structure and function prediction. *Nat Protoc* (2010) **5**:725–738. doi:10.1038/nprot.2010.5
2. RAMACHANDRAN GN, RAMAKRISHNAN C, SASISEKHARAN V. Stereochemistry of polypeptide chain configurations. *J Mol Biol* (1963) **7**:95–99. doi:10.1016/s0022-2836(63)80023-6
3. Laskowski RA, Jabłońska J, Pravda L, Vařeková RS, Thornton JM. PDBsum: Structural summaries of PDB entries. *Protein Sci* (2018) **27**:129–134. doi:10.1002/pro.3289
4. Wiederstein M, Sippl MJ. ProSA-web: interactive web service for the recognition of errors in three-dimensional structures of proteins. *Nucleic Acids Res* (2007) **35**:W407–10. doi:10.1093/nar/gkm290
5. Eisenberg D, Lüthy R, Bowie JU. VERIFY3D: assessment of protein models with three-dimensional profiles. *Methods Enzymol* (1997) **277**:396–404. doi:10.1016/S0076-6879(97)77022-8
6. Ponomarenko J, Bui H-H, Li W, Fusseder N, Bourne PE, Sette A, Peters B. ElliPro: a new structure-based tool for the prediction of antibody epitopes. *BMC Bioinformatics* (2008) **9**:514. doi:10.1186/1471-2105-9-514
7. Gupta S, Kapoor P, Chaudhary K, Gautam A, Kumar R, Open Source Drug Discovery Consortium, Raghava GPS. In silico approach for predicting toxicity of peptides and proteins. *PLoS One* (2013) **8**:e73957. doi:10.1371/journal.pone.0073957
8. Dimitrov I, Bangov I, Flower DR, Doytchinova I. AllerTOP v.2 - A server for in silico prediction of allergens. *J Mol Model* (2014) **20**: doi:10.1007/s00894-014-2278-5
9. Dimitrov I, Naneva L, Doytchinova I, Bangov I. AllergenFP: Allergenicity prediction by descriptor fingerprints. *Bioinformatics* (2014) **30**:846–851. doi:10.1093/bioinformatics/btt619

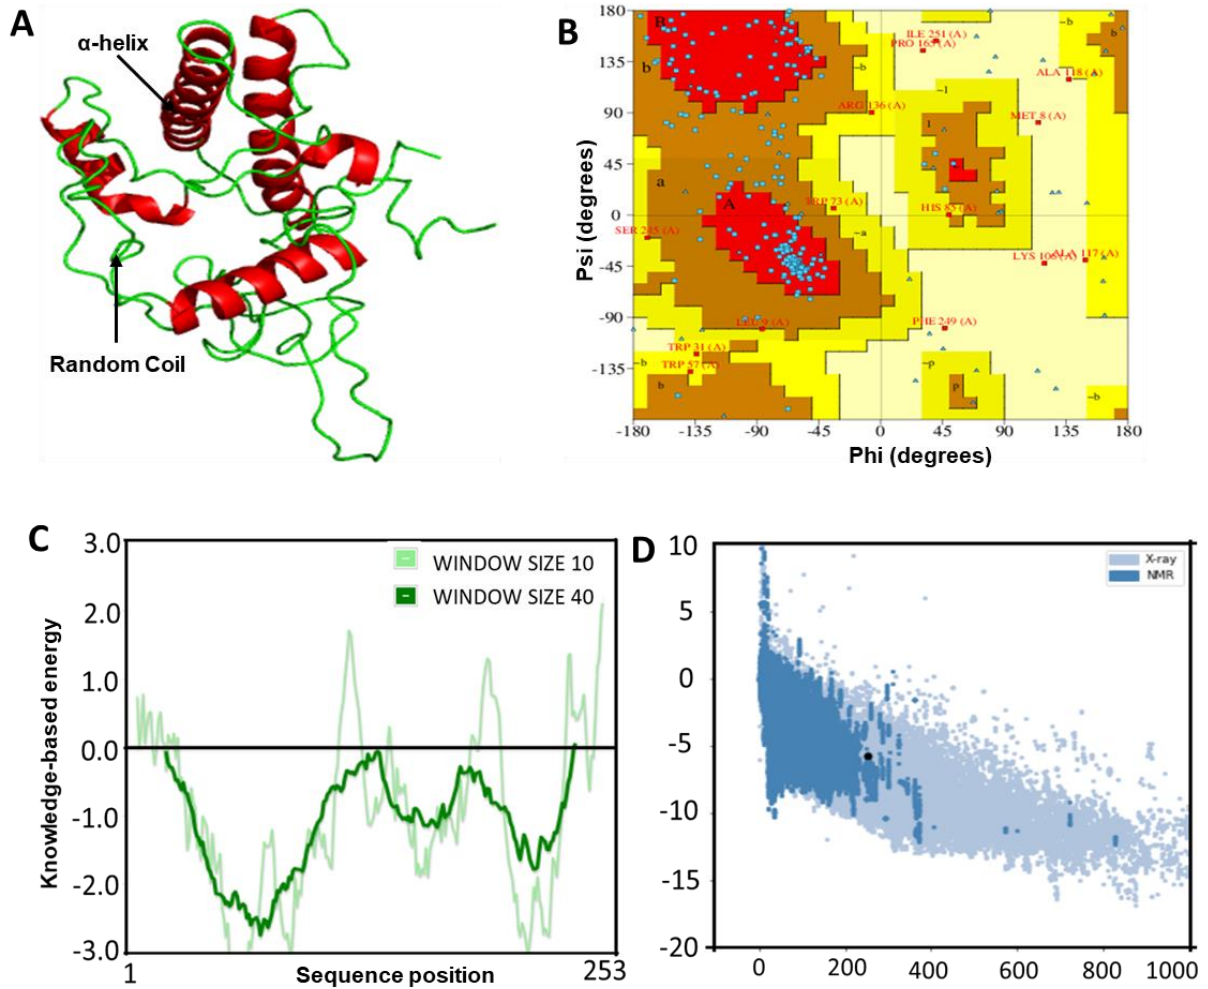

**Figure S1:** Evaluation of the predicted protein three-dimensional structure of the human major prion protein (huPrP). A) three-dimensional structure of the huPrP which is enriched with alpha-helix and random coils B) Ramachandran plot for the predicted three-dimensional structure of the huPrP (68.4% residues in most favoured region, 24.7% in allowed regions, 3.7% in generously allowed regions, and 3.2% residues in the disallowed regions) indicating the good quality of the protein structure C) ProSA energy plot for the predicted protein model. Herein 0.0 is the baseline, the sequence position under the baseline (0.0) indicates the good quality of the protein model. D) ProSA Z-score of the predicted huPrP three-dimensional structure where the black dot in that position indicates the good quality of the protein 3D structure.

**Table S1:** Properties of the identified proteins following direct antibody treatment (DAT) of the neuroblastoma cell line. The properties were identified by Progenesis Software after the LC-MS analysis. Selected 26 proteins have been highlighted as bold.

| Accession         | Peptides  | Unique peptides | Confidence score | Anova (p)       | q Value         | Max fold change | Highest Mean | Lowest Mean | Description                                                                            |
|-------------------|-----------|-----------------|------------------|-----------------|-----------------|-----------------|--------------|-------------|----------------------------------------------------------------------------------------|
| A0A0A6YY04        | 5         | 1               | 31.8             | 0.0006          | 0.514327        | $\alpha$        | CTL          | DAT         | Nuclear receptor subfamily 5 group A member 2 GN=Nr5a2                                 |
| A0A0B4J1P1        | 1         | 1               | 5.19             | 0.00526         | 0.514327        | 545             | CTL          | DAT         | T cell receptor beta_ variable 30 (Fragment) GN=Trbv30                                 |
| A0A0G2JFJ8        | 1         | 1               | 5.79             | 0.021708        | 0.720313        | 38.8            | CTL          | DAT         | SWI/SNF complex subunit SMARCC1 (Fragment) GN=Smarcc1                                  |
| A0A1D5RLY9        | 2         | 1               | 11.5             | 0.040093        | 0.892186        | $\alpha$        | CTL          | DAT         | Signal-induced proliferation-associated 1-like protein 2 GN=Sipa112                    |
| <b>A0A2I3BPI0</b> | <b>10</b> | <b>2</b>        | <b>55.9</b>      | <b>0.043282</b> | <b>0.923819</b> | <b>33.2</b>     | <b>CTL</b>   | <b>DAT</b>  | <b>Coiled-coil domain-containing protein 187 GN=Ccdc187</b>                            |
| A0A140LHI9        | 1         | 1               | 5.5              | 0.006527        | 0.514327        | 42.5            | CTL          | DAT         | Sodium- and chloride-dependent glycine transporter 2 GN=Slc6a5                         |
| A0A140LIX9        | 3         | 1               | 15.9             | 0.002447        | 0.514327        | 13.1            | CTL          | DAT         | Cilia and flagella-associated protein 99 GN=Cfap99                                     |
| A2AM95            | 1         | 1               | 5.31             | 0.035641        | 0.884384        | 12.6            | CTL          | DAT         | Emerin GN=Emd                                                                          |
| B0QZL5            | 6         | 1               | 40.8             | 0.000559        | 0.514327        | $\alpha$        | CTL          | DAT         | Phosphatidylinositol 4_5-bisphosphate 3-kinase catalytic subunit GN=Pik3cd             |
| <b>B2RUM8</b>     | <b>10</b> | <b>4</b>        | <b>57.5</b>      | <b>0.008377</b> | <b>0.57741</b>  | <b>20</b>       | <b>CTL</b>   | <b>DAT</b>  | <b>RNA helicase GN=Ddx18</b>                                                           |
| B2RUQ2            | 3         | 1               | 14.1             | 0.040093        | 0.892186        | $\alpha$        | CTL          | DAT         | Gene model 608_ (NCBI) GN=Usf3                                                         |
| B9EKD9            | 3         | 2               | 15.3             | 0.047213        | 0.942414        | 22.6            | CTL          | DAT         | Unkempt-like (Drosophila) GN=Unkl                                                      |
| D3YZZ6            | 4         | 1               | 29.6             | 0.018967        | 0.714122        | 167             | CTL          | DAT         | Eukaryotic translation initiation factor 2A (Fragment) GN=Eif2a                        |
| D3Z4N0            | 42        | 1               | 239              | 0.016418        | 0.712925        | 13.9            | CTL          | DAT         | Pleckstrin homology-like domain family B member 1 GN=Phldb1                            |
| D3Z061            | 3         | 1               | 16.9             | 0.040093        | 0.892186        | $\alpha$        | CTL          | DAT         | Ubiquitin-like modifier-activating enzyme 6 GN=Uba6                                    |
| E0CY42            | 2         | 1               | 9.48             | 0.040093        | 0.892186        | $\alpha$        | CTL          | DAT         | Chloride intracellular channel protein 6 (Fragment) GN=Clic6                           |
| E9PWB1            | 42        | 1               | 237              | 0.016417        | 0.712925        | 13.9            | CTL          | DAT         | Pleckstrin homology-like domain family B member 1 GN=Phldb1                            |
| E9QK48            | 4         | 1               | 21.4             | 0.040093        | 0.892186        | $\alpha$        | CTL          | DAT         | Echinoderm microtubule-associated protein-like 2 GN=Eml2                               |
| G3UXY0            | 8         | 1               | 56.6             | 0.040093        | 0.892186        | $\alpha$        | CTL          | DAT         | Proteasome activator complex subunit 1 GN=Psmc1                                        |
| J3QPG5            | 27        | 1               | 213              | 0.033712        | 0.878143        | 16.5            | CTL          | DAT         | Prosaposin GN=Psap                                                                     |
| P05555            | 4         | 1               | 22.9             | 0.002871        | 0.514327        | 15              | CTL          | DAT         | Integrin alpha-M GN=Itgam                                                              |
| <b>P19426</b>     | <b>20</b> | <b>5</b>        | <b>117</b>       | <b>0.003643</b> | <b>0.514327</b> | <b>12.3</b>     | <b>CTL</b>   | <b>DAT</b>  | <b>Negative elongation factor E GN=Nelfe</b>                                           |
| P61027            | 10        | 1               | 79.2             | 0.012547        | 0.659912        | 11.2            | CTL          | DAT         | Ras-related protein Rab-10 GN=Rab10                                                    |
| P70320            | 4         | 1               | 23               | 0.040242        | 0.892186        | 1.93E+04        | CTL          | DAT         | Tousled-like kinase GN=Trk2                                                            |
| P70404            | 2         | 1               | 17               | 0.000851        | 0.514327        | 4.63E+03        | CTL          | DAT         | Isocitrate dehydrogenase [NAD] subunit gamma 1_ mitochondrial GN=Ihd3g                 |
| Q3TDV6            | 2         | 1               | 10.8             | 0.017986        | 0.714122        | 79.1            | CTL          | DAT         | Uncharacterized protein GN=Mad111                                                      |
| Q3TLH6            | 15        | 1               | 179              | 0.025065        | 0.770252        | 21.7            | CTL          | DAT         | FABP domain-containing protein GN=Fabp5                                                |
| Q3TNE8            | 1         | 1               | 6.01             | 0.010298        | 0.612225        | 12.9            | CTL          | DAT         | D-aspartate oxidase GN=Ddo                                                             |
| Q3UEK5            | 8         | 1               | 56.1             | 0.014589        | 0.681384        | 138             | CTL          | DAT         | Uncharacterized protein GN=Ahsq                                                        |
| Q5FW97            | 63        | 1               | 848              | 0.008469        | 0.57741         | 11.8            | CTL          | DAT         | Enolase 1_ alpha non-neuron GN=EG433182                                                |
| Q8BHS6            | 3         | 2               | 21.8             | 0.002646        | 0.514327        | 52.7            | CTL          | DAT         | Armadillo repeat-containing X-linked protein 3 GN=Armcx3                               |
| Q8CDS3            | 4         | 1               | 28.6             | 0.040093        | 0.892186        | $\alpha$        | CTL          | DAT         | DUF4629 domain-containing protein GN=493043311Rik                                      |
| Q8CF78            | 34        | 1               | 421              | 0.008469        | 0.57741         | 11.8            | CTL          | DAT         | Uncharacterized protein                                                                |
| Q9D4H2            | 5         | 1               | 24.1             | 0.042914        | 0.923819        | 27.4            | CTL          | DAT         | GRIP and coiled-coil domain-containing protein 1 GN=Gcc1                               |
| Q9QY83            | 1         | 1               | 5.99             | 0.040093        | 0.892186        | $\alpha$        | CTL          | DAT         | Actin-like protein 7B GN=Actl7b                                                        |
| Q78JN3            | 4         | 1               | 27.6             | 0.001244        | 0.514327        | 10.2            | CTL          | DAT         | Enoyl-CoA delta isomerase 3_ peroxisomal GN=Eci3                                       |
| Q91V48            | 3         | 2               | 13.6             | 0.00125         | 0.514327        | 23.3            | CTL          | DAT         | Protocadherin beta 21 GN=Pcdhb21                                                       |
| <b>Q497U2</b>     | <b>20</b> | <b>2</b>        | <b>107</b>       | <b>0.021997</b> | <b>0.720313</b> | <b>20.3</b>     | <b>CTL</b>   | <b>DAT</b>  | <b>Pcnt protein (Fragment) GN=Pcnt</b>                                                 |
| <b>Q05816</b>     | <b>22</b> | <b>3</b>        | <b>260</b>       | <b>0.01719</b>  | <b>0.714122</b> | <b>16</b>       | <b>CTL</b>   | <b>DAT</b>  | <b>Fatty acid-binding protein 5 GN=Fabp5</b>                                           |
| Q60737            | 2         | 1               | 16.1             | 0.01737         | 0.714122        | 17.9            | CTL          | DAT         | Casein kinase II subunit alpha GN=Csnk2a1                                              |
| A0A0G2JDPO        | 1         | 1               | 4.41             | 0.044814        | 0.936178        | 46.6            | DAT          | CTL         | HCLS1-associated protein X-1 GN=Hax1                                                   |
| <b>A0A0N4SVL0</b> | <b>15</b> | <b>3</b>        | <b>88.3</b>      | <b>0.004893</b> | <b>0.514327</b> | <b>14.1</b>     | <b>DAT</b>   | <b>CTL</b>  | <b>Eukaryotic translation initiation factor 4 gamma 3 GN=Eif4g3</b>                    |
| A0A0N5E9G7        | 3         | 2               | 12.9             | 0.031157        | 0.846738        | 12.6            | DAT          | CTL         | Replication factor C subunit 1 GN=Rfc1                                                 |
| A0A0R4J0G9        | 1         | 1               | 5.47             | 0.038889        | 0.892186        | 1.53E+03        | DAT          | CTL         | Methionine synthase reductase GN=Mtrr                                                  |
| A0A0R4J046        | 4         | 1               | 21.8             | 0.032966        | 0.872172        | 15.7            | DAT          | CTL         | CCAAT/enhancer-binding protein zeta GN=Cebpz                                           |
| A0A1B0GSZ7        | 1         | 1               | 4.75             | 0.022596        | 0.722164        | 16.1            | DAT          | CTL         | Tetraspanin GN=Cd37                                                                    |
| A0A1C7ZMY0        | 1         | 1               | 4.75             | 0.006459        | 0.514327        | 14.6            | DAT          | CTL         | Neuromedin-U receptor 1 GN=Nmur1 PE=3 SV=2                                             |
| A0A1G5SJ32        | 1         | 1               | 10.9             | 0.017103        | 0.714122        | $\alpha$        | DAT          | CTL         | NLR family_ pyrin domain containing 1A_ CAST/EiJ strain specific GN=OTTMUSCASC00059399 |
| A0A2I3BRC7        | 1         | 1               | 5.98             | 0.002212        | 0.514327        | 470             | DAT          | CTL         | Nuclear receptor coactivator 4 GN=Ncoa4                                                |
| <b>A0A2R8VHP3</b> | <b>12</b> | <b>2</b>        | <b>91.5</b>      | <b>0.003933</b> | <b>0.514327</b> | <b>267</b>      | <b>DAT</b>   | <b>CTL</b>  | <b>Predicted pseudogene 5478 GN=Gm5478</b>                                             |

|               |           |          |             |                 |                 |             |            |            |                                                                                                                 |
|---------------|-----------|----------|-------------|-----------------|-----------------|-------------|------------|------------|-----------------------------------------------------------------------------------------------------------------|
| A0A4X8        | 6         | 3        | 37.8        | 0.022592        | 0.722164        | 1.19E+03    | DAT        | CTL        | Uncharacterized protein GN=Kirrel2                                                                              |
| A0A087WPN2    | 1         | 1        | 9.78        | 0.01951         | 0.714122        | 1.05E+03    | DAT        | CTL        | Zinc finger protein GN=Gm3604                                                                                   |
| A0A087WRM0    | 3         | 1        | 23.7        | 0.000956        | 0.514327        | 48.8        | DAT        | CTL        | Protein CDV3 (Fragment) GN=Cdv3                                                                                 |
| A2A6Q8        | 2         | 1        | 11.1        | 0.040422        | 0.892186        | 11.8        | DAT        | CTL        | Myosin light chain 4 (Fragment) GN=My14                                                                         |
| <b>A2A8L5</b> | <b>18</b> | <b>5</b> | <b>102</b>  | <b>0.006077</b> | <b>0.514327</b> | <b>11.9</b> | <b>DAT</b> | <b>CTL</b> | <b>Receptor-type tyrosine-protein phosphatase F GN=Ptpfrf</b>                                                   |
| A2AHM2        | 2         | 1        | 20.6        | 0.014154        | 0.681384        | 39.8        | DAT        | CTL        | Zinc finger protein 931 GN=Zfp931                                                                               |
| <b>A2RSV8</b> | <b>8</b>  | <b>2</b> | <b>60.5</b> | <b>0.002291</b> | <b>0.514327</b> | <b>17.9</b> | <b>DAT</b> | <b>CTL</b> | <b>Cytochrome c oxidase subunit IV isoform 1 GN=Cox4i1</b>                                                      |
| <b>A2RSY1</b> | <b>11</b> | <b>3</b> | <b>74.2</b> | <b>0.030784</b> | <b>0.842352</b> | <b>13.7</b> | <b>DAT</b> | <b>CTL</b> | <b>KAT8 regulatory NSL complex subunit 3 GN=Kansl3</b>                                                          |
| <b>A4FUV6</b> | <b>20</b> | <b>7</b> | <b>130</b>  | <b>0.003153</b> | <b>0.514327</b> | <b>23.4</b> | <b>DAT</b> | <b>CTL</b> | <b>Met protein (Fragment) GN=Met</b>                                                                            |
| <b>A7E215</b> | <b>7</b>  | <b>3</b> | <b>42.8</b> | <b>0.035183</b> | <b>0.883997</b> | <b>18</b>   | <b>DAT</b> | <b>CTL</b> | <b>Rps6ka3 protein (Fragment) GN=Rps6ka3</b>                                                                    |
| <b>B1AZR7</b> | <b>9</b>  | <b>4</b> | <b>60.8</b> | <b>0.006661</b> | <b>0.514327</b> | <b>11.7</b> | <b>DAT</b> | <b>CTL</b> | <b>Protocadherin 11 X-linked GN=Pcdh11x</b>                                                                     |
| B1GX81        | 8         | 3        | 37.7        | 0.022569        | 0.722164        | 11.2        | DAT        | CTL        | PAK3cb protein GN=Pak3                                                                                          |
| B9EHZ5        | 3         | 1        | 15.8        | 0.002389        | 0.514327        | 13.5        | DAT        | CTL        | Membrane protein_ palmitoylated 6 (MAGUK p55 subfamily member 6) GN=Mpp6                                        |
| D3YYX0        | 3         | 1        | 15.2        | 0.014416        | 0.681384        | 10.4        | DAT        | CTL        | Thioredoxin-related transmembrane protein 2 (Fragment) GN=Tmx2                                                  |
| D3YZ62        | 32        | 1        | 179         | 0.001589        | 0.514327        | 66.7        | DAT        | CTL        | Unconventional myosin-Va GN=Myo5a                                                                               |
| D3Z2G0        | 1         | 1        | 6.27        | 0.015175        | 0.69075         | 42.4        | DAT        | CTL        | Ankyrin repeat domain 29 (Fragment) GN=Ankrd29                                                                  |
| D3Z4S3        | 1         | 1        | 4.22        | 0.019286        | 0.714122        | 152         | DAT        | CTL        | Putative peptidyl-tRNA hydrolase PTRHD1 GN=Pthrhd1                                                              |
| <b>E9QKD1</b> | <b>12</b> | <b>2</b> | <b>74.5</b> | <b>0.048564</b> | <b>0.942414</b> | <b>201</b>  | <b>DAT</b> | <b>CTL</b> | <b>Nucleolar protein 8 GN=Nol8</b>                                                                              |
| F6VQX8        | 13        | 1        | 61.9        | 0.015894        | 0.712925        | $\alpha$    | DAT        | CTL        | Predicted gene 20547 (Fragment) GN=Gm20547                                                                      |
| F6WAU7        | 2         | 1        | 9.57        | 0.019483        | 0.714122        | $\alpha$    | DAT        | CTL        | Zinc finger protein 945 GN=Zfp945                                                                               |
| F6XN97        | 1         | 1        | 9.82        | 0.018875        | 0.714122        | 22.4        | DAT        | CTL        | RIKEN cDNA 0610010K14 gene GN=0610010K14Rik                                                                     |
| F6YZ61        | 3         | 1        | 20.8        | 0.00734         | 0.553291        | 18.2        | DAT        | CTL        | Coiled-coil and C2 domain-containing protein 2A (Fragment) GN=Ce2d2a                                            |
| F7BTP0        | 1         | 1        | 5.38        | 0.006278        | 0.514327        | $\alpha$    | DAT        | CTL        | Non-homologous end-joining factor 1 (Fragment) GN=Nhej1                                                         |
| G5E8E1        | 17        | 1        | 108         | 0.008067        | 0.57741         | 11.3        | DAT        | CTL        | Leucine-rich repeat flightless-interacting protein 1 GN=Lrrfip1                                                 |
| G5E852        | 4         | 1        | 19.9        | 0.005488        | 0.514327        | 11.3        | DAT        | CTL        | Tyrosine-protein kinase GN=Jak2                                                                                 |
| H7BWX6        | 1         | 1        | 5.87        | 0.028547        | 0.834895        | $\alpha$    | DAT        | CTL        | CCR4-NOT transcription complex subunit 2 GN=Cnot2                                                               |
| <b>H7BX49</b> | <b>13</b> | <b>3</b> | <b>73.6</b> | <b>0.041295</b> | <b>0.901501</b> | <b>16.1</b> | <b>DAT</b> | <b>CTL</b> | <b>WD repeat-containing protein 90 GN=Wdr90</b>                                                                 |
| J3S6Y1        | 2         | 1        | 16.5        | 0.036343        | 0.892186        | 32.2        | DAT        | CTL        | Thrombospondin-type laminin G domain and EAR repeat-containing protein GN=Tspcar                                |
| O55111        | 5         | 1        | 24.5        | 0.020868        | 0.714122        | 12          | DAT        | CTL        | Desmoglein-2 GN=Dsg2                                                                                            |
| P13439        | 2         | 1        | 17.4        | 0.029442        | 0.840688        | 10.1        | DAT        | CTL        | Uridine 5'-monophosphate synthase GN=Umps                                                                       |
| P19157        | 8         | 1        | 86          | 0.047941        | 0.942414        | $\alpha$    | DAT        | CTL        | Glutathione S-transferase P 1 GN=Gstp1                                                                          |
| P61460        | 6         | 2        | 32.5        | 0.019541        | 0.714122        | 18.5        | DAT        | CTL        | GATOR complex protein DEPDC5 GN=Depdc5                                                                          |
| P70313        | 4         | 2        | 23.4        | 0.013434        | 0.680528        | 260         | DAT        | CTL        | Nitric oxide synthase_ endothelial GN=Nos3                                                                      |
| Q0VBN2        | 6         | 1        | 33.6        | 0.012107        | 0.659912        | 38.9        | DAT        | CTL        | Dermatan-sulfate epimerase-like protein GN=Dsel                                                                 |
| <b>Q3TW28</b> | <b>31</b> | <b>9</b> | <b>171</b>  | <b>0.004071</b> | <b>0.514327</b> | <b>111</b>  | <b>DAT</b> | <b>CTL</b> | <b>Uncharacterized protein GN=Tpp2</b>                                                                          |
| Q3U0E6        | 1         | 1        | 10.3        | 0.048831        | 0.942414        | 54.8        | DAT        | CTL        | Uncharacterized protein                                                                                         |
| Q3UAF1        | 9         | 1        | 73.4        | 0.037821        | 0.892186        | 17.5        | DAT        | CTL        | Uncharacterized protein GN=Ddx39                                                                                |
| <b>Q3UBP6</b> | <b>58</b> | <b>3</b> | <b>802</b>  | <b>0.018806</b> | <b>0.714122</b> | <b>12.3</b> | <b>DAT</b> | <b>CTL</b> | <b>Uncharacterized protein GN=Actb</b>                                                                          |
| <b>Q3UR03</b> | <b>7</b>  | <b>3</b> | <b>49.1</b> | <b>0.020842</b> | <b>0.714122</b> | <b>29.9</b> | <b>DAT</b> | <b>CTL</b> | <b>Myomegalin (Fragment) GN=Pde4dip</b>                                                                         |
| Q3V277        | 6         | 1        | 34.5        | 0.018635        | 0.714122        | 16          | DAT        | CTL        | Uncharacterized protein GN=Zbtb1                                                                                |
| <b>Q5U430</b> | <b>10</b> | <b>3</b> | <b>53.5</b> | <b>0.005487</b> | <b>0.514327</b> | <b>65.4</b> | <b>DAT</b> | <b>CTL</b> | <b>E3 ubiquitin-protein ligase UBR3 GN=Ubr3</b>                                                                 |
| Q6P5U7        | 6         | 3        | 32.2        | 0.005966        | 0.514327        | 96.1        | DAT        | CTL        | NACHT and WD repeat domain-containing protein 2 GN=Nwd2                                                         |
| <b>Q6PDI5</b> | <b>25</b> | <b>6</b> | <b>142</b>  | <b>0.007494</b> | <b>0.554431</b> | <b>11.1</b> | <b>DAT</b> | <b>CTL</b> | <b>Proteasome adapter and scaffold protein ECM29 GN=Ecpas</b>                                                   |
| Q6PE66        | 2         | 1        | 10          | 0.048515        | 0.942414        | $\alpha$    | DAT        | CTL        | Phosphorylase b kinase regulatory subunit GN=Phka2                                                              |
| Q8BJL0        | 3         | 2        | 14.4        | 0.021422        | 0.719171        | 11.1        | DAT        | CTL        | SWI/SNF-related matrix-associated actin-dependent regulator of chromatin subfamily A-like protein 1 GN=Smarca11 |
| Q8BN58        | 7         | 1        | 35          | 0.042906        | 0.923819        | 243         | DAT        | CTL        | Rho GTPase-activating protein 28 GN=Arhgap28                                                                    |
| Q8BV20        | 3         | 1        | 23.4        | 0.014183        | 0.681384        | 13.3        | DAT        | CTL        | Uncharacterized protein GN=Rhobtb2                                                                              |
| Q8K368        | 4         | 2        | 20.4        | 0.006121        | 0.514327        | $\alpha$    | DAT        | CTL        | Fanconi anemia group I protein homolog GN=Fanci                                                                 |
| <b>Q8K442</b> | <b>10</b> | <b>2</b> | <b>60</b>   | <b>0.004472</b> | <b>0.514327</b> | <b>12.7</b> | <b>DAT</b> | <b>CTL</b> | <b>ATP-binding cassette sub-family A member 8-A GN=Abca8a</b>                                                   |
| Q8R464        | 3         | 2        | 22.2        | 0.018245        | 0.714122        | 22.1        | DAT        | CTL        | Cell adhesion molecule 4 GN=Cadm4                                                                               |
| Q8VDK4        | 3         | 1        | 16          | 0.00398         | 0.514327        | 15.4        | DAT        | CTL        | Cadherin 13 GN=Cdh13                                                                                            |
| Q9CZJ2        | 4         | 1        | 21.8        | 0.026437        | 0.805263        | 14.9        | DAT        | CTL        | Heat shock 70 kDa protein 12B GN=Hspa12b                                                                        |
| Q9ERC8        | 8         | 4        | 35.3        | 0.001969        | 0.514327        | 73.8        | DAT        | CTL        | Down syndrome cell adhesion molecule homolog GN=Dscam                                                           |
| <b>Q9WUM5</b> | <b>12</b> | <b>4</b> | <b>68.1</b> | <b>0.04593</b>  | <b>0.936178</b> | <b>17.1</b> | <b>DAT</b> | <b>CTL</b> | <b>Succinate--CoA ligase [ADP/GDP-forming] subunit alpha_mitochondrial GN=Suclg1</b>                            |
| Q80T69        | 5         | 1        | 24.2        | 0.020869        | 0.714122        | 23          | DAT        | CTL        | Lysine-specific demethylase 9 GN=Rsb1                                                                           |
| <b>Q80XC6</b> | <b>9</b>  | <b>2</b> | <b>46.5</b> | <b>0.048742</b> | <b>0.942414</b> | <b>28.8</b> | <b>DAT</b> | <b>CTL</b> | <b>Nuclear exosome regulator NRDE2 GN=Nrde2</b>                                                                 |
| Q91VN1        | 2         | 1        | 11.8        | 0.01209         | 0.659912        | 295         | DAT        | CTL        | Zinc finger protein 24 GN=Znf24                                                                                 |
| Q91XY5        | 4         | 1        | 19.9        | 0.03448         | 0.879244        | 12.2        | DAT        | CTL        | Protocadherin gamma A3 GN=Pcdhga3                                                                               |
| <b>Q99JW2</b> | <b>10</b> | <b>2</b> | <b>62.7</b> | <b>0.021118</b> | <b>0.714964</b> | $\alpha$    | <b>DAT</b> | <b>CTL</b> | <b>Aminoacylase-1 GN=Acy1</b>                                                                                   |
| <b>Q499M4</b> | <b>6</b>  | <b>2</b> | <b>45.2</b> | <b>0.010421</b> | <b>0.612225</b> | <b>10.7</b> | <b>DAT</b> | <b>CTL</b> | <b>Tigger transposable element derived 5 GN=Tigd5</b>                                                           |

|               |           |          |           |                 |                 |             |            |            |                                              |
|---------------|-----------|----------|-----------|-----------------|-----------------|-------------|------------|------------|----------------------------------------------|
| Q544Y3        | 4         | 1        | 21.6      | 0.028631        | 0.834895        | 12.3        | DAT        | CTL        | CRAL-TRIO domain-containing protein GN=Rlbp1 |
| <b>Q02819</b> | <b>10</b> | <b>4</b> | <b>52</b> | <b>0.044479</b> | <b>0.935234</b> | <b>33.1</b> | <b>DAT</b> | <b>CTL</b> | <b>Nucleobindin-1 GN=Nuch1</b>               |

**Table S2:** Properties of the identified proteins following direct antibody treatment (DAT) of the mouse primary neuron (MPN) in comparison with untreated cells. The properties were identified by Progenesis Software after the LC-MS analysis.

| Accession  | Gene ID   | Peptides | Unique peptides | Confidence score | Anova (p) | q Value  | Max fold change | Highest Mean | Lowest Mean | Description                                                              |
|------------|-----------|----------|-----------------|------------------|-----------|----------|-----------------|--------------|-------------|--------------------------------------------------------------------------|
| O70291     | Grk4      | 3        | 1               | 19.1             | 1.28E-05  | 0.001518 | 1.42 E+03       | NOT          | DAT         | G protein-coupled receptor kinase 4 GN=Grk4                              |
| A6H5U5     | Lrrfp1    | 5        | 2               | 26.6             | 2.07E-05  | 0.001931 | 3.03            | NOT          | DAT         | Lrrfp1 protein GN=Lrrfp1                                                 |
| B2RU82     | Slc30a9   | 4        | 2               | 23.5             | 3.57E-05  | 0.002914 | 7.03            | NOT          | DAT         | Solute carrier family 30 (Zinc transporter)_ member 9 GN=Slc30a9         |
| Q8BNV9     | Hoxc8     | 2        | 2               | 15.7             | 4.46E-05  | 0.003232 | 14.5            | NOT          | DAT         | Homeobox domain-containing protein (Fragment) GN=Hoxc8                   |
| A0A5F8MPF0 | Kif1b     | 5        | 1               | 31.4             | 5.10E-05  | 0.003328 | 106             | DAT          | NOT         | Kinesin-like protein KIF1B GN=Kif1b                                      |
| P56480     | Atp5f1b   | 26       | 19              | 213              | 5.81E-05  | 0.003442 | 6.63            | NOT          | DAT         | ATP synthase subunit beta_mitochondrial GN=Atp5f1b                       |
| A2A4A6     | Plcg1     | 8        | 8               | 42.4             | 7.54E-05  | 0.003611 | 1.86            | DAT          | NOT         | 1-phosphatidylinositol 4_5-bisphosphate phosphodiesterase gamma GN=Plcg1 |
| A0A0R4J0A4 | Flt1      | 4        | 4               | 15.6             | 7.59E-05  | 0.003611 | 5.69            | NOT          | DAT         | Vascular endothelial growth factor receptor 1 GN=Flt1                    |
| A2RTV8     | Rln1      | 3        | 2               | 21.6             | 8.31E-05  | 0.003611 | 5.22            | NOT          | DAT         | Prorelaxin 1 GN=Rln1                                                     |
| B1AXW5     | Prdx1     | 8        | 6               | 60.2             | 9.35E-05  | 0.003809 | 2.44            | NOT          | DAT         | Peroxiredoxin-1 (Fragment) GN=Prdx1                                      |
| Q8VC94     | Rpl11     | 4        | 1               | 24               | 0.000106  | 0.004072 | 5.93            | NOT          | DAT         | Rpl11 protein GN=Rpl11                                                   |
| A0A571BEW5 | Lpar2     | 3        | 2               | 19.3             | 0.000114  | 0.004136 | 10.6            | DAT          | NOT         | Lysophosphatidic acid receptor 2 GN=Lpar2                                |
| A0A5F8MPM7 | -         | 3        | 2               | 15.4             | 0.000152  | 0.005107 | 4.32            | NOT          | DAT         | Cingulin GN=Cgn                                                          |
| Q99KI0     | Aco2      | 13       | 11              | 74               | 0.000167  | 0.005107 | 2.15            | DAT          | NOT         | Aconitate hydratase_mitochondrial GN=Aco2                                |
| A0A571BEG7 | Patj      | 3        | 2               | 17.9             | 0.000176  | 0.005107 | 2.6             | NOT          | DAT         | InaD-like protein GN=Patj                                                |
| Q8VHU9     | -         | 4        | 1               | 28.4             | 0.000204  | 0.005552 | 193             | NOT          | DAT         | Eukaryotic translation initiation factor 5A (Fragment)                   |
| P03995     | Gfap      | 6        | 4               | 44.9             | 0.00024   | 0.005963 | 4               | NOT          | DAT         | Glial fibrillary acidic protein GN=Gfap                                  |
| P15864     | H1-2      | 8        | 1               | 98               | 0.000247  | 0.005963 | 4.84            | NOT          | DAT         | Histone H1.2 GN=H1-2                                                     |
| Q8VDD5     | Myh9      | 16       | 10              | 94.9             | 0.000437  | 0.008407 | 2.28            | NOT          | DAT         | Myosin-9 GN=Myh9                                                         |
| A0A0U1RNK7 | Dock7     | 8        | 4               | 58.2             | 0.000438  | 0.008407 | 12.3            | NOT          | DAT         | Dedicator of cytokinesis protein 7 GN=Dock7                              |
| A0A0R4J1E2 | Eef1d     | 4        | 2               | 27.4             | 0.000509  | 0.009159 | 4.78            | NOT          | DAT         | Elongation factor 1-delta GN=Eef1d                                       |
| B9EIW5     | Ncoa7     | 13       | 9               | 96.5             | 0.00052   | 0.009159 | 1.96            | DAT          | NOT         | Ncoa7 protein GN=Ncoa7                                                   |
| P43274     | H1-4      | 10       | 3               | 115              | 0.000597  | 0.00973  | 2.73            | NOT          | DAT         | Histone H1.4 GN=H1-4                                                     |
| Q8BVV3     | Pknox2    | 3        | 2               | 14.9             | 0.00062   | 0.009856 | 11.2            | NOT          | DAT         | Meis_PKNOX_N domain-containing protein GN=Pknox2                         |
| Q920P5     | Ak5       | 3        | 3               | 17.2             | 0.000903  | 0.01306  | 1.61            | DAT          | NOT         | Adenylate kinase isoenzyme 5 GN=Ak5                                      |
| Q8BK67     | Rcc2      | 5        | 3               | 28.4             | 0.000918  | 0.01306  | 4.56            | NOT          | DAT         | Protein RCC2 GN=Rcc2                                                     |
| E9Q3I8     | Its1      | 14       | 1               | 81.7             | 0.000921  | 0.01306  | 1.7             | DAT          | NOT         | Intersectin-1 GN=Its1                                                    |
| Q5I2A0     | Serpina3g | 5        | 5               | 21.9             | 0.001085  | 0.014152 | 8.49            | DAT          | NOT         | Serine protease inhibitor A3G GN=Serpina3g                               |
| B1ARR7     | Eno1      | 15       | 2               | 188              | 0.001199  | 0.015032 | 2.09            | NOT          | DAT         | Alpha-enolase (Fragment) GN=Eno1                                         |
| P62918     | Rpl8      | 5        | 5               | 49.1             | 0.001225  | 0.015065 | 8.33            | NOT          | DAT         | 60S ribosomal protein L8 GN=Rpl8                                         |
| Q571K1     | Golgb1    | 7        | 4               | 30               | 0.001304  | 0.015223 | 11.2            | NOT          | DAT         | MKIAA4151 protein (Fragment) GN=Golgb1                                   |
| Q58E64     | Eef1a1    | 22       | 2               | 253              | 0.001306  | 0.015223 | 6.07            | NOT          | DAT         | Elongation factor 1-alpha GN=Eef1a1                                      |
| A0A2R8VHH1 | Nup155    | 5        | 2               | 31.3             | 0.001364  | 0.015603 | 4.68            | NOT          | DAT         | Nuclear pore complex protein Nup155 GN=Nup155                            |
| Q52KG5     | Kif26a    | 4        | 1               | 27.1             | 0.001557  | 0.017387 | 13.6            | NOT          | DAT         | Kinesin-like protein KIF26A GN=Kif26a                                    |
| Q6KAM8     | Flna      | 5        | 2               | 28.2             | 0.001573  | 0.017387 | 4.25            | NOT          | DAT         | MFLJ00343 protein (Fragment) GN=Flna                                     |
| B7ZP22     | Hnrnpa2b1 | 11       | 10              | 74.8             | 0.001645  | 0.017875 | 2.03            | DAT          | NOT         | Heterogeneous nuclear ribonucleoprotein A2/B1 GN=Hnrnpa2b1               |
| P40142     | Tkt       | 24       | 6               | 199              | 0.001711  | 0.018215 | 2.02            | DAT          | NOT         | Transketolase GN=Tkt                                                     |
| A0A1S6GWJ8 | Hnrmpm    | 2        | 1               | 15.3             | 0.001839  | 0.018732 | 21              | DAT          | NOT         | Uncharacterized protein GN=Hnrmpm                                        |
| S4R2B0     | Rbm25     | 17       | 10              | 91.1             | 0.00206   | 0.020553 | 1.2             | DAT          | NOT         | RNA-binding protein 25 (Fragment) GN=Rbm25                               |

|            |                   |    |    |      |          |          |      |     |     |                                                                                  |
|------------|-------------------|----|----|------|----------|----------|------|-----|-----|----------------------------------------------------------------------------------|
| Q6DFZ2     | Syne2             | 3  | 2  | 23.3 | 0.002138 | 0.020553 | 4.13 | NOT | DAT | Nesprin-2 (Fragment) GN=Syne2                                                    |
| Q9D9Y2     |                   | 15 | 5  | 106  | 0.002336 | 0.021117 | 11.6 | NOT | DAT | Uncharacterized protein                                                          |
| Q3UEM8     | Hspa5             | 22 | 1  | 208  | 0.002391 | 0.021117 | 1.93 | NOT | DAT | Uncharacterized protein (Fragment) GN=Hspa5                                      |
| Q3TI47     | Hspa5             | 25 | 2  | 226  | 0.002391 | 0.021117 | 1.93 | NOT | DAT | Uncharacterized protein GN=Hspa5                                                 |
| Q3UHN1     | Slit3             | 4  | 3  | 17   | 0.002397 | 0.021117 | 4.55 | DAT | NOT | Uncharacterized protein GN=Slit3                                                 |
| Q149Z9     | H1f3              | 12 | 3  | 121  | 0.00255  | 0.021875 | 1.61 | NOT | DAT | Histone cluster 1_H1d GN=H1f3                                                    |
| Q6PIE8     | Efcab6            | 7  | 5  | 41.6 | 0.002651 | 0.022159 | 1.62 | NOT | DAT | EF-hand calcium-binding domain-containing protein 6 GN=Efcab6                    |
| Q3U900     | Rpn1              | 5  | 4  | 36   | 0.002952 | 0.024362 | 7.23 | NOT | DAT | Dolichyl-diphosphooligosaccharide--protein glycosyltransferase subunit 1 GN=Rpn1 |
| F6ZSB7     | Phgdh             | 9  | 3  | 62.7 | 0.003123 | 0.025453 | 2.07 | NOT | DAT | D-3-phosphoglycerate dehydrogenase (Fragment) GN=Phgdh                           |
| A2A841     | Epb41             | 5  | 4  | 35.5 | 0.003273 | 0.025595 | 2.28 | DAT | NOT | Protein 4.1 GN=Epb41                                                             |
| Q8BFZ3     | Actb12            | 16 | 5  | 158  | 0.003283 | 0.025595 | 3.21 | DAT | NOT | Beta-actin-like protein 2 GN=Actb12                                              |
| Q3U741     | Ddx17             | 6  | 4  | 33.9 | 0.003315 | 0.025595 | 1.4  | DAT | NOT | Probable ATP-dependent RNA helicase DDX17 GN=Ddx17                               |
| Q3UZQ3     | Eef1a1            | 23 | 3  | 238  | 0.003475 | 0.025924 | 5.08 | NOT | DAT | Elongation factor 1-alpha GN=Eef1a1                                              |
| P19426     | Nelfe             | 19 | 5  | 97.7 | 0.003499 | 0.025924 | 1.49 | DAT | NOT | Negative elongation factor E GN=Nelfe                                            |
| Q6PCM4     | Zfp157            | 3  | 2  | 17.8 | 0.003979 | 0.028699 | 1.62 | NOT | DAT | Zinc finger protein 157 GN=Zfp157                                                |
| A0A140LI36 | Adgb              | 14 | 13 | 62.3 | 0.004005 | 0.028699 | 1.52 | NOT | DAT | Androglobin GN=Adgb                                                              |
| A4GZ26     | Iqsec2            | 5  | 4  | 26.8 | 0.004831 | 0.032866 | 35.3 | NOT | DAT | ARF6 guanine nucleotide exchange factor IQArfGEF GN=Iqsec2                       |
| B2RY51     | Trip11            | 14 | 9  | 76   | 0.004839 | 0.032866 | 2.34 | DAT | NOT | Thyroid hormone receptor interactor 11 GN=Trip11                                 |
| Q4KL76     | Hspe1             | 7  | 7  | 79.7 | 0.00557  | 0.036686 | 1.77 | NOT | DAT | Heat shock protein 1 (Chaperonin 10) GN=Hspe1                                    |
| G3V011     | Myo1f             | 7  | 7  | 33.8 | 0.005817 | 0.037927 | 1.85 | NOT | DAT | Unconventional myosin-I f GN=Myo1f                                               |
| P21550     | Eno3              | 10 | 3  | 98.1 | 0.005908 | 0.038141 | 3.21 | NOT | DAT | Beta-enolase GN=Eno3                                                             |
| A0A2R8W6H9 | Amhr2             | 3  | 3  | 15.6 | 0.006062 | 0.038715 | 4.38 | NOT | DAT | Receptor protein serine/threonine kinase GN=Amhr2                                |
| A2BH06     | Rpl11             | 5  | 1  | 26.9 | 0.006508 | 0.040804 | 3.82 | NOT | DAT | 60S ribosomal protein L11 (Fragment) GN=Rpl11                                    |
| Q3UV17     | Krt76             | 2  | 2  | 15   | 0.006681 | 0.040875 | 2.39 | DAT | NOT | Keratin_type II cytoskeletal 2 oral GN=Krt76                                     |
| Q810Y8     | Pramel7           | 6  | 4  | 35   | 0.006682 | 0.040875 | 1.49 | DAT | NOT | Preferentially expressed antigen in melanoma-like protein 7 GN=Pramel7           |
| B9EIX2     | Cep170b           | 4  | 2  | 26.8 | 0.006841 | 0.041044 | 2.85 | NOT | DAT | AW555464 protein GN=Cep170b                                                      |
| Q3UZK5     | Akap13            | 3  | 2  | 19.9 | 0.006861 | 0.041044 | 5.03 | NOT | DAT | Uncharacterized protein (Fragment) GN=Akap13                                     |
| E9QQ38     | Ddhd1             | 3  | 3  | 20.4 | 0.007007 | 0.041537 | 2.11 | NOT | DAT | Phospholipase DDHD1 GN=Ddhd1                                                     |
| Q0VAV0     | Zfp947            | 2  | 2  | 15.9 | 0.007199 | 0.042289 | 2    | DAT | NOT | Predicted gene_EG210853 GN=Zfp947                                                |
| A0A0R4J0F6 | Gak               | 5  | 4  | 33.5 | 0.007796 | 0.044988 | 2.84 | DAT | NOT | Cyclin-G-associated kinase GN=Gak                                                |
| G3UZR1     | Tubb5             | 4  | 1  | 41.2 | 0.008171 | 0.046738 | 3.85 | NOT | DAT | Tubulin beta-5 chain (Fragment) GN=Tubb5                                         |
| G3X9G2     | Mink1             | 6  | 3  | 31.1 | 0.008453 | 0.04753  | 1.46 | DAT | NOT | Misshapen-like kinase 1 GN=Mink1                                                 |
| P63038     | Hspd1             | 48 | 43 | 479  | 0.008456 | 0.04753  | 1.76 | DAT | NOT | 60 kDa heat shock protein_mitochondrial GN=Hspd1                                 |
| F6Q404     | Pdia3             | 6  | 1  | 34.6 | 0.00903  | 0.049811 | 1.79 | NOT | DAT | Protein disulfide-isomerase A3 (Fragment) GN=Pdia3                               |
| Q9CVR0     | Tubb4b            | 10 | 1  | 77.3 | 0.009108 | 0.049811 | 1.88 | NOT | DAT | Tubulin beta chain (Fragment) GN=Tubb4b                                          |
| Q69ZK1     | N4bp2             | 5  | 3  | 22.5 | 0.009179 | 0.049811 | 1.67 | DAT | NOT | MKIAA1413 protein (Fragment) GN=N4bp2                                            |
| E9QA15     | Cald1             | 8  | 6  | 41.7 | 0.009482 | 0.050679 | 2.12 | DAT | NOT | Caldesmon 1 GN=Cald1                                                             |
| P99024     | Tubb5             | 13 | 1  | 108  | 0.010344 | 0.053959 | 2.2  | NOT | DAT | Tubulin beta-5 chain GN=Tubb5                                                    |
| F8VQ72     | Map3k1            | 4  | 3  | 25.3 | 0.011311 | 0.058469 | 7.01 | NOT | DAT | Mitogen-activated protein kinase kinase kinase 1 GN=Map3k1                       |
| Q922A0     | Eno2              | 8  | 1  | 71.6 | 0.01148  | 0.058469 | 3.02 | NOT | DAT | Eno2 protein (Fragment) GN=Eno2                                                  |
| Q3UDU4     | Ldha              | 14 | 1  | 122  | 0.011567 | 0.058469 | 3.83 | NOT | DAT | L-lactate dehydrogenase GN=Ldha                                                  |
| Q3TCI7     | Ldha              | 15 | 4  | 126  | 0.011567 | 0.058469 | 3.83 | NOT | DAT | L-lactate dehydrogenase GN=Ldha                                                  |
| A0A5F8MPR1 | Epb4113           | 4  | 2  | 17.1 | 0.01235  | 0.060812 | 1.99 | NOT | DAT | Band 4.1-like protein 3 GN=Epb4113                                               |
| K3W4R2     | Myh14             | 14 | 10 | 70.5 | 0.012789 | 0.062183 | 1.83 | NOT | DAT | Myosin-14 GN=Myh14                                                               |
| A0A0R4J1M7 | Scn5a             | 9  | 5  | 44.4 | 0.012895 | 0.062183 | 1.96 | DAT | NOT | Sodium channel protein GN=Scn5a                                                  |
| E9QKC6     | Trim2             | 3  | 1  | 22.3 | 0.013071 | 0.06221  | 2.55 | DAT | NOT | Tripartite motif-containing protein 2 GN=Trim2                                   |
| E9PWX1     | Dpp6              | 4  | 2  | 18.6 | 0.014166 | 0.065976 | 12   | NOT | DAT | Dipeptidyl aminopeptidase-like protein 6 GN=Dpp6                                 |
| Q545V3     | Eno2              | 12 | 4  | 88.8 | 0.015634 | 0.070505 | 2.45 | NOT | DAT | Uncharacterized protein GN=Eno2                                                  |
| Q91Y50     | Il4               | 3  | 1  | 27   | 0.015679 | 0.070505 | 2.02 | NOT | DAT | Interleukin-4 GN=Il4                                                             |
| P05214     | Tuba3a;<br>Tuba3b | 11 | 1  | 82.7 | 0.016349 | 0.072638 | 132  | NOT | DAT | Tubulin alpha-3 chain GN=Tuba3a                                                  |

|            |               |    |    |      |          |          |      |     |     |                                                                                     |
|------------|---------------|----|----|------|----------|----------|------|-----|-----|-------------------------------------------------------------------------------------|
| B1ASE2     | Atp5h         | 4  | 3  | 23.8 | 0.016376 | 0.072638 | 1.41 | NOT | DAT | ATP synthase_H+-transporting_mitochondrial F0 complex_subunit D (Fragment) GN=Atp5h |
| A0A1W2P6F6 | Myl6          | 4  | 3  | 31.1 | 0.016804 | 0.073537 | 1.81 | DAT | NOT | Myosin light polypeptide 6 GN=Myl6                                                  |
| B2RSU7     | Gcc2          | 6  | 2  | 44.1 | 0.017369 | 0.075001 | 1.91 | DAT | NOT | GRIP and coiled-coil domain containing 2 GN=Gcc2                                    |
| S4R2M7     | Pgk1          | 12 | 1  | 115  | 0.018003 | 0.076325 | 1.54 | DAT | NOT | Phosphoglycerate kinase GN=Pgk1                                                     |
| O08553     | Dpysl2        | 7  | 4  | 42   | 0.018016 | 0.076325 | 1.8  | DAT | NOT | Dihydropyrimidinase-related protein 2 GN=Dpysl2                                     |
| A0A2R8VHL8 | Pcbp2         | 2  | 1  | 20   | 0.018043 | 0.076325 | 18.5 | NOT | DAT | Poly(rC)-binding protein 2 (Fragment) GN=Pcbp2                                      |
| Q504P4     | Hspa8         | 24 | 1  | 203  | 0.01828  | 0.076325 | 1.79 | DAT | NOT | Heat shock cognate 71 kDa protein GN=Hspa8                                          |
| Q921L4     | LOC665622     | 6  | 6  | 51.4 | 0.018405 | 0.076325 | 2.8  | NOT | DAT | Histone H2B GN=LOC665622                                                            |
| B7ZCQ3     | Hmgn2         | 3  | 3  | 33   | 0.018578 | 0.076325 | 2.54 | NOT | DAT | Non-histone chromosomal protein HMG-17 GN=Hmgn2                                     |
| P48678     | Lmna          | 15 | 9  | 109  | 0.019392 | 0.078255 | 1.66 | DAT | NOT | Prelamin-A/C GN=Lmna                                                                |
| A0A087WP85 | Ktn1          | 5  | 3  | 30.2 | 0.019442 | 0.078255 | 2.01 | DAT | NOT | Kinectin GN=Ktn1                                                                    |
| Q6NZC6     | Zim1          | 4  | 1  | 22.1 | 0.020482 | 0.08094  | 4.42 | NOT | DAT | Zinc finger_imprinted 1 GN=Zim1                                                     |
| Q8VCF1     | Cant1         | 3  | 1  | 15.2 | 0.021307 | 0.083194 | 2.91 | DAT | NOT | Soluble calcium-activated nucleotidase 1 GN=Cant1                                   |
| Q6PDG0     | Nup205        | 6  | 3  | 23.6 | 0.022523 | 0.086648 | 1.78 | DAT | NOT | Nup205 protein (Fragment) GN=Nup205                                                 |
| E9PV14     | Epb4111       | 6  | 6  | 26.5 | 0.022649 | 0.086648 | 1.57 | DAT | NOT | Band 4.1-like protein 1 GN=Epb4111                                                  |
| Q3U3C9     | Gse1          | 11 | 7  | 67.4 | 0.024252 | 0.090363 | 1.54 | DAT | NOT | Genetic suppressor element 1 GN=Gse1                                                |
| F8WIJ0     | Slc12a4       | 5  | 3  | 38.9 | 0.024559 | 0.090509 | 2.88 | DAT | NOT | Solute carrier family 12 member 4 GN=Slc12a4                                        |
| Q6ZPW1     | Zfp512b       | 4  | 4  | 18.5 | 0.026979 | 0.098277 | 1.38 | DAT | NOT | MKIAA1196 protein (Fragment) GN=Zfp512b                                             |
| S4R257     | Gapdh         | 26 | 4  | 259  | 0.028422 | 0.102957 | 1.55 | NOT | DAT | Glyceraldehyde-3-phosphate dehydrogenase (Fragment) GN=Gapdh                        |
| A0A5F8MPP4 | Usp25         | 3  | 2  | 19.1 | 0.028778 | 0.103672 | 1.72 | DAT | NOT | Ubiquitin carboxyl-terminal hydrolase 25 GN=Usp25                                   |
| A0A0R4J0F3 | Ppp1r32       | 3  | 1  | 28.3 | 0.029546 | 0.104702 | 2.91 | NOT | DAT | Protein phosphatase 1 regulatory subunit 32 GN=Ppp1r32                              |
| D3Z2L1     | Gtf3c2        | 3  | 1  | 16.7 | 0.032089 | 0.111294 | 2.15 | NOT | DAT | General transcription factor 3C polypeptide 2 (Fragment) GN=Gtf3c2                  |
| B2RY59     | Neur14        | 5  | 3  | 32.3 | 0.032941 | 0.113049 | 1.8  | NOT | DAT | Neur14 protein GN=Neur14                                                            |
| D3YYN7     | Atp1a2        | 6  | 1  | 30.5 | 0.03366  | 0.114313 | 1.93 | NOT | DAT | Sodium/potassium-transporting ATPase subunit alpha GN=Atp1a2                        |
| A2AFS0     | Sars          | 4  | 3  | 24.1 | 0.033934 | 0.114646 | 1.81 | DAT | NOT | Serine--tRNA ligase_cytoplasmic (Fragment) GN=Sars                                  |
| Q8C7V5     | Foxm1         | 3  | 2  | 16.3 | 0.034456 | 0.115808 | 4.81 | NOT | DAT | Fork-head domain-containing protein GN=Foxm1                                        |
| Q3TXL0     | Ero1a         | 4  | 4  | 22.8 | 0.035909 | 0.120075 | 3.4  | NOT | DAT | Uncharacterized protein (Fragment) GN=Ero11                                         |
| A0A286YCM2 | Hnrmpk        | 3  | 3  | 19.6 | 0.036144 | 0.120244 | 9.63 | NOT | DAT | Heterogeneous nuclear ribonucleoprotein K (Fragment) GN=Hnrmpk                      |
| A0A3B2W7W2 | Ppard         | 19 | 17 | 121  | 0.036966 | 0.120519 | 1.43 | DAT | NOT | Peroxisome proliferator-activated receptor delta GN=Ppard                           |
| Q9R167     | Zfp108        | 5  | 4  | 21.4 | 0.038144 | 0.12204  | 2.58 | NOT | DAT | Zinc finger protein ZFP108 GN=Zfp108                                                |
| Q3UQ07     | Gm12359       | 2  | 1  | 15.3 | 0.03821  | 0.12204  | 1.77 | DAT | NOT | Uncharacterized protein (Fragment) GN=Gm12359                                       |
| Q3UGQ6     | Zbtb43        | 4  | 2  | 23   | 0.038643 | 0.12204  | 2.82 | DAT | NOT | Uncharacterized protein GN=Zbtb43                                                   |
| Q3TRH3     | Hspa8         | 24 | 1  | 185  | 0.038649 | 0.12204  | 1.62 | DAT | NOT | Uncharacterized protein GN=Hspa8                                                    |
| Q3T9F2     | Gm10183       | 3  | 2  | 21.5 | 0.038743 | 0.12204  | 1.33 | DAT | NOT | Uncharacterized protein GN=Gm10183                                                  |
| Q3UZG3     | Hnrnpa3       | 12 | 11 | 87   | 0.039177 | 0.122813 | 1.71 | DAT | NOT | Uncharacterized protein GN=Hnrnpa3                                                  |
| Q3UBP6     | Actb          | 36 | 4  | 356  | 0.040245 | 0.124255 | 1.39 | DAT | NOT | Uncharacterized protein GN=Actb                                                     |
| Q3U7D2     | Rpl15         | 2  | 1  | 29   | 0.040268 | 0.124255 | 1.81 | NOT | DAT | Ribosomal protein L15 GN=Rpl15                                                      |
| P62900     | Rpl31         | 2  | 1  | 20.1 | 0.040399 | 0.124255 | 1.52 | DAT | NOT | 60S ribosomal protein L31 GN=Rpl31                                                  |
| Q5DTN5     | Dhx8          | 4  | 2  | 20   | 0.041758 | 0.126428 | 2.4  | DAT | NOT | MKIAA4096 protein (Fragment) GN=Dhx8                                                |
| A0A1S6GWJ9 | Tsfm          | 2  | 1  | 22.2 | 0.041783 | 0.126428 | 4.35 | DAT | NOT | Elongation factor Ts_mitochondrial GN=Tsfm                                          |
| A0A0A6YXM1 | Nphp3         | 6  | 2  | 27.1 | 0.041843 | 0.126428 | 1.72 | DAT | NOT | Nephrocystin-3 (Fragment) GN=Nphp3                                                  |
| A0A087WRQ1 | 1700017N19Rik | 5  | 3  | 23.4 | 0.044042 | 0.13234  | 2.12 | DAT | NOT | RIKEN cDNA 1700017N19 gene GN=1700017N19Rik                                         |
| A0A1Y7VLS3 | Togaram1      | 5  | 3  | 29.9 | 0.045049 | 0.13386  | 2.03 | NOT | DAT | TOG array regulator of axonal microtubules protein 1 GN=Togaram1                    |
| P60335     | Pcbp1         | 3  | 2  | 20.9 | 0.04645  | 0.136367 | 2.62 | DAT | NOT | Poly(rC)-binding protein 1 GN=Pcbp1                                                 |
| Q8BG87     | Tet3          | 4  | 4  | 20.1 | 0.046638 | 0.136367 | 1.91 | DAT | NOT | Methylcytosine dioxygenase TET3 GN=Tet3                                             |
| Q8QZY6     | Tspan14       | 6  | 4  | 36   | 0.047878 | 0.139181 | 1.75 | DAT | NOT | Tetraspanin-14 GN=Tspan14                                                           |



**Table S3:** Properties of the identified proteins following direct antibody treatment (DAT) of the mouse primary neuron (MPN) in comparison with 3F4 antibody treated cells. The properties were identified by Progenesis Software after the LC-MS analysis.

| Accession   | Gene ID    | Peptides | Unique peptides | Confidence score | Anova (p) | q Value  | Max fold change | Highest Mean | Lowest Mean | Description                                                   |
|-------------|------------|----------|-----------------|------------------|-----------|----------|-----------------|--------------|-------------|---------------------------------------------------------------|
| O70291      | Grk4       | 3        | 1               | 19.1             | 2.08E-06  | 0.000538 | 1.07 E+03       | 3F4          | DAT         | G protein-coupled receptor kinase 4 GN=Grk4                   |
| A0A2R8VH H1 | Nup155     | 5        | 2               | 31.3             | 6.29E-06  | 0.000978 | 69.3            | 3F4          | DAT         | Nuclear pore complex protein Nup155 GN=Nup155                 |
| B2RRA8      | Zfp114     | 3        | 3               | 18               | 1.07E-05  | 0.001245 | 7.32            | 3F4          | DAT         | Zfp114 protein GN=Zfp114                                      |
| Q3TCI7      | Ldha       | 15       | 4               | 126              | 1.31E-05  | 0.001245 | 14.9            | 3F4          | DAT         | L-lactate dehydrogenase GN=Ldha                               |
| Q3UDU4      | Ldha       | 14       | 1               | 122              | 1.31E-05  | 0.001245 | 14.9            | 3F4          | DAT         | L-lactate dehydrogenase GN=Ldha                               |
| Q8BI84      | Mia3       | 2        | 1               | 16.4             | 1.44E-05  | 0.001245 | 19.5            | 3F4          | DAT         | Transport and Golgi organization protein 1 homolog GN=Mia3    |
| A0A571BEW 5 | Lpar2      | 3        | 2               | 19.3             | 1.65E-05  | 0.001283 | 32.4            | DAT          | 3F4         | Lysophosphatidic acid receptor 2 GN=Lpar2                     |
| D3YVU4      | Kdm2b      | 3        | 2               | 17.1             | 2.29E-05  | 0.001619 | 4.98            | 3F4          | DAT         | Lysine-specific demethylase 2B GN=Kdm2b                       |
| Q66JU1      | Eif3c      | 2        | 1               | 16.5             | 2.65E-05  | 0.001716 | 14.8            | 3F4          | DAT         | Eif3c protein (Fragment) GN=Eif3c                             |
| A2A931      | Prdm16     | 4        | 4               | 20.3             | 4.17E-05  | 0.002492 | 44.5            | 3F4          | DAT         | Histone-lysine N-methyltransferase PRDM16 GN=Prdm16           |
| O70475      | Ugdh       | 4        | 3               | 19.7             | 0.000137  | 0.005909 | 6.12            | 3F4          | DAT         | UDP-glucose 6-dehydrogenase GN=Ugdh                           |
| A2AEP2      | Ccnb3      | 6        | 6               | 35               | 0.00015   | 0.006139 | 2.42            | DAT          | 3F4         | Cyclin B3 GN=Ccnb3                                            |
| Q9JL04      | Fmn2       | 3        | 2               | 29.6             | 0.000248  | 0.008766 | 4.29            | 3F4          | DAT         | Formin-2 GN=Fmn2                                              |
| P80316      | Cct5       | 8        | 4               | 49.9             | 0.000393  | 0.012708 | 7.08            | 3F4          | DAT         | T-complex protein 1 subunit epsilon GN=Cct5                   |
| B2RY59      | Neur14     | 5        | 3               | 32.3             | 0.000431  | 0.013384 | 2.26            | 3F4          | DAT         | Neur14 protein GN=Neur14                                      |
| E7CHD7      | Rpgrip1    | 3        | 2               | 17.5             | 0.000517  | 0.014884 | 85.3            | 3F4          | DAT         | RPGRIP1 variant-11aa GN=Rpgrip1                               |
| Q58E64      | Eef1a1     | 22       | 2               | 253              | 0.000541  | 0.014884 | 9.08            | 3F4          | DAT         | Elongation factor 1-alpha GN=Eef1a1                           |
| A0A0R4J0A4  | Flt1       | 4        | 4               | 15.6             | 0.000542  | 0.014884 | 5.12            | 3F4          | DAT         | Vascular endothelial growth factor receptor 1 GN=Flt1         |
| Q5I2A0      | Serpina3g  | 5        | 5               | 21.9             | 0.000556  | 0.014884 | 10.9            | DAT          | 3F4         | Serine protease inhibitor A3G GN=Serpina3g                    |
| Q3TYF2      | Pacsin1    | 4        | 2               | 26.8             | 0.000728  | 0.018256 | 2.4             | 3F4          | DAT         | Uncharacterized protein GN=Pacsin1                            |
| P40142      | Tkt        | 24       | 6               | 199              | 0.001049  | 0.024705 | 2.06            | DAT          | 3F4         | Transketolase GN=Tkt                                          |
| Q91YN0      | D6Wsu163 e | 3        | 2               | 21.4             | 0.001087  | 0.024837 | 3.1             | 3F4          | DAT         | Protein C12orf4 homolog GN=D6Wsu163e                          |
| A2A841      | Epb41      | 5        | 4               | 35.5             | 0.001155  | 0.025531 | 2.42            | DAT          | 3F4         | Protein 4.1 GN=Epb41                                          |
| Q6P1E8      | Efcab6     | 7        | 5               | 41.6             | 0.001826  | 0.035477 | 1.38            | 3F4          | DAT         | EF-hand calcium-binding domain-containing protein 6 GN=Efcab6 |
| B9EIX2      | Cep170b    | 4        | 2               | 26.8             | 0.002388  | 0.045254 | 3.35            | 3F4          | DAT         | AW555464 protein GN=Cep170b                                   |
| P48678      | Lmna       | 15       | 9               | 109              | 0.003897  | 0.068809 | 1.59            | 3F4          | DAT         | Prelamin-A/C GN=Lmna                                          |
| A2AUM9      | Cep152     | 8        | 4               | 43.4             | 0.004152  | 0.0717   | 2.03            | 3F4          | DAT         | Centrosomal protein of 152 kDa GN=Cep152                      |
| P56480      | Atp5f1b    | 26       | 19              | 213              | 0.004416  | 0.074595 | 2.33            | 3F4          | DAT         | ATP synthase subunit beta_ mitochondrial GN=Atp5f1b           |
| E9Q039      | Npepps     | 4        | 3               | 24               | 0.006189  | 0.100177 | 2.87            | DAT          | 3F4         | Aminopeptidase GN=Npepps                                      |
| Q8VHU9      |            | 4        | 1               | 28.4             | 0.006467  | 0.100496 | 12.3            | 3F4          | DAT         | Eukaryotic translation initiation factor 5A (Fragment)        |
| Q99KI0      | Aco2       | 13       | 11              | 74               | 0.007022  | 0.102946 | 1.28            | 3F4          | DAT         | Aconitate hydratase_ mitochondrial GN=Aco2                    |
| P03995      | Gfap       | 6        | 4               | 44.9             | 0.007408  | 0.104651 | 2.09            | 3F4          | DAT         | Glial fibrillary acidic protein GN=Gfap                       |
| A0A0U1RN K7 | Dock7      | 8        | 4               | 58.2             | 0.008247  | 0.112418 | 3.67            | 3F4          | DAT         | Dedicator of cytokinesis protein 7 GN=Dock7                   |
| Q8BNV9      | Hoxc8      | 2        | 2               | 15.7             | 0.00874   | 0.114883 | 2.61            | 3F4          | DAT         | Homeobox domain-containing protein (Fragment) GN=Hoxc8        |
| Q3U741      | Ddx17      | 6        | 4               | 33.9             | 0.009554  | 0.116711 | 1.28            | DAT          | 3F4         | Probable ATP-dependent RNA helicase DDX17 GN=Ddx17            |
| P15864      | H1-2       | 8        | 1               | 98               | 0.009624  | 0.116711 | 1.92            | 3F4          | DAT         | Histone H1.2 GN=H1-2                                          |
| G3UW90      | Trps1      | 2        | 1               | 20.5             | 0.009914  | 0.116711 | 2.37            | 3F4          | DAT         | Zinc finger transcription factor Trps1 GN=Trps1               |
| G5E898      | Ppl        | 3        | 1               | 15.6             | 0.010981  | 0.127351 | 1.78            | 3F4          | DAT         | Periplakin GN=Ppl                                             |
| E9Q0H6      | Fabp7      | 2        | 2               | 16               | 0.012505  | 0.13832  | 2.08            | 3F4          | DAT         | Fatty acid-binding protein_ brain GN=Fabp7                    |

|                |               |    |    |      |          |          |      |     |     |                                                                                           |
|----------------|---------------|----|----|------|----------|----------|------|-----|-----|-------------------------------------------------------------------------------------------|
| A0A0R4J0F3     | Ppp1r32       | 3  | 1  | 28.3 | 0.012639 | 0.13832  | 3.77 | 3F4 | DAT | Protein phosphatase 1 regulatory subunit 32<br>GN=Ppp1r32                                 |
| Q3UYB8         | Bfsp2         | 2  | 2  | 16.4 | 0.012875 | 0.138939 | 2.5  | 3F4 | DAT | IF rod domain-containing protein GN=Bfsp2                                                 |
| Q3TXL0         | Ero1a         | 4  | 4  | 22.8 | 0.013641 | 0.145188 | 2.54 | 3F4 | DAT | Uncharacterized protein (Fragment) GN=Ero11                                               |
| Q3TRH3         | Hspa8         | 24 | 1  | 185  | 0.014146 | 0.148432 | 1.7  | 3F4 | DAT | Uncharacterized protein GN=Hspa8                                                          |
| B2RY51         | Trip11        | 14 | 9  | 76   | 0.014327 | 0.148432 | 1.47 | 3F4 | DAT | Thyroid hormone receptor interactor 11<br>GN=Trip11                                       |
| A2RTV8         | Rln1          | 3  | 2  | 21.6 | 0.014583 | 0.149097 | 1.87 | 3F4 | DAT | Prorelaxin 1 GN=Rln1                                                                      |
| Q504P4         | Hspa8         | 24 | 1  | 203  | 0.014974 | 0.150078 | 1.7  | 3F4 | DAT | Heat shock cognate 71 kDa protein GN=Hspa8                                                |
| A0A5F8MP<br>M7 |               | 3  | 2  | 15.4 | 0.015727 | 0.154081 | 2.58 | 3F4 | DAT | Cingulin GN=Cgn                                                                           |
| A0A0A0MQ<br>E8 | Arhgap21      | 4  | 3  | 14.9 | 0.015864 | 0.154081 | 1.62 | 3F4 | DAT | Rho GTPase-activating protein 21 GN=Arhgap21                                              |
| Q3TH56         | Hspa8         | 27 | 2  | 212  | 0.018351 | 0.169838 | 1.37 | 3F4 | DAT | Uncharacterized protein GN=Hspa8                                                          |
| Q8BI87         | Zfp536        | 5  | 2  | 29.1 | 0.019704 | 0.178019 | 2.14 | DAT | 3F4 | Uncharacterized protein GN=Zfp536                                                         |
| Q9QZ83         | Actg1         | 25 | 1  | 267  | 0.020739 | 0.185218 | 2.44 | DAT | 3F4 | Gamma actin-like protein GN=Actg1                                                         |
| D3Z6I8         | Tpm3          | 4  | 4  | 43.6 | 0.022731 | 0.193879 | 1.78 | 3F4 | DAT | Tropomyosin alpha-3 chain GN=Tpm3                                                         |
| S4R1I4         | Cep112        | 6  | 4  | 34.7 | 0.024967 | 0.206379 | 2.09 | DAT | 3F4 | Centrosomal protein of 112 kDa GN=Cep112                                                  |
| Q7M6X7         | Zfp457        | 3  | 2  | 16.4 | 0.02509  | 0.206379 | 1.89 | DAT | 3F4 | Zinc finger protein 457 GN=Zfp457                                                         |
| Q8VDD5         | Myh9          | 16 | 10 | 94.9 | 0.025409 | 0.206379 | 1.47 | 3F4 | DAT | Myosin-9 GN=Myh9                                                                          |
| E9Q9Y2         | Ncor1         | 5  | 3  | 23.7 | 0.025812 | 0.206765 | 1.59 | 3F4 | DAT | Nuclear receptor corepressor 1 GN=Ncor1                                                   |
| A0A0R4J1L9     | Mtus1         | 3  | 1  | 15.8 | 0.029234 | 0.231786 | 1.42 | 3F4 | DAT | Microtubule-associated tumor suppressor 1<br>homolog GN=Mtus1                             |
| Q8VC94         | Rpl11         | 4  | 1  | 24   | 0.030881 | 0.241476 | 1.95 | 3F4 | DAT | Rpl11 protein GN=Rpl11                                                                    |
| Q80U88         | mKIAA003<br>8 | 2  | 1  | 15.2 | 0.031268 | 0.241476 | 2.13 | 3F4 | DAT | MKIAA0038 protein (Fragment)<br>GN=mKIAA0038                                              |
| A0A1W2P6F<br>6 | Myl6          | 4  | 3  | 31.1 | 0.031389 | 0.241476 | 1.67 | DAT | 3F4 | Myosin light polypeptide 6 GN=Myl6                                                        |
| Q8CF60         | Znf263        | 9  | 8  | 61.5 | 0.031949 | 0.242375 | 1.55 | DAT | 3F4 | Zinc finger protein 263 GN=Zfp263                                                         |
| Q8BMK4         | Ckap4         | 3  | 2  | 20   | 0.032518 | 0.242945 | 1.76 | DAT | 3F4 | Cytoskeleton-associated protein 4 GN=Ckap4                                                |
| A0A0R4J0F6     | Gak           | 5  | 4  | 33.5 | 0.03711  | 0.267908 | 2.67 | DAT | 3F4 | Cyclin-G-associated kinase GN=Gak                                                         |
| B2RSN3         | Tubb2b        | 17 | 4  | 129  | 0.037686 | 0.267908 | 1.15 | 3F4 | DAT | Tubulin beta chain GN=Tubb2b                                                              |
| E9Q3V9         | Adgrl1        | 6  | 6  | 26.3 | 0.037928 | 0.267908 | 1.33 | DAT | 3F4 | Adhesion G protein-coupled receptor L1<br>GN=Adgrl1                                       |
| Q6NZC6         | Zim1          | 4  | 1  | 22.1 | 0.039303 | 0.272664 | 3.26 | 3F4 | DAT | Zinc finger_ imprinted 1 GN=Zim1                                                          |
| A0A0R4J1E2     | Eef1d         | 4  | 2  | 27.4 | 0.041579 | 0.283392 | 1.67 | 3F4 | DAT | Elongation factor 1-delta GN=Eef1d                                                        |
| Q9WUF3         | Casp8ap2      | 16 | 10 | 98.3 | 0.042856 | 0.286423 | 2.09 | DAT | 3F4 | CASP8-associated protein 2 GN=Casp8ap2                                                    |
| B1ASE2         | Atp5h         | 4  | 3  | 23.8 | 0.044441 | 0.292633 | 1.24 | 3F4 | DAT | ATP synthase_ H+-transporting_ mitochondrial F0<br>complex_ subunit D (Fragment) GN=Atp5h |
| C3S7Q5         | Ofcc1         | 3  | 2  | 17.9 | 0.047028 | 0.302589 | 2.15 | 3F4 | DAT | Ojoplano variant A GN=Ofcc1                                                               |
| A0A5F8MPH<br>5 | Syt12         | 6  | 4  | 28.2 | 0.048267 | 0.304908 | 1.65 | 3F4 | DAT | Synaptotagmin-like protein 2 GN=Syt12                                                     |
| Q9CYV4         | Zfp329        | 3  | 3  | 18.2 | 0.049219 | 0.306061 | 1.29 | 3F4 | DAT | Uncharacterized protein GN=Zfp329                                                         |
| Q8BK67         | Rcc2          | 5  | 3  | 28.4 | 0.049238 | 0.306061 | 1.81 | 3F4 | DAT | Protein RCC2 GN=Rcc2                                                                      |

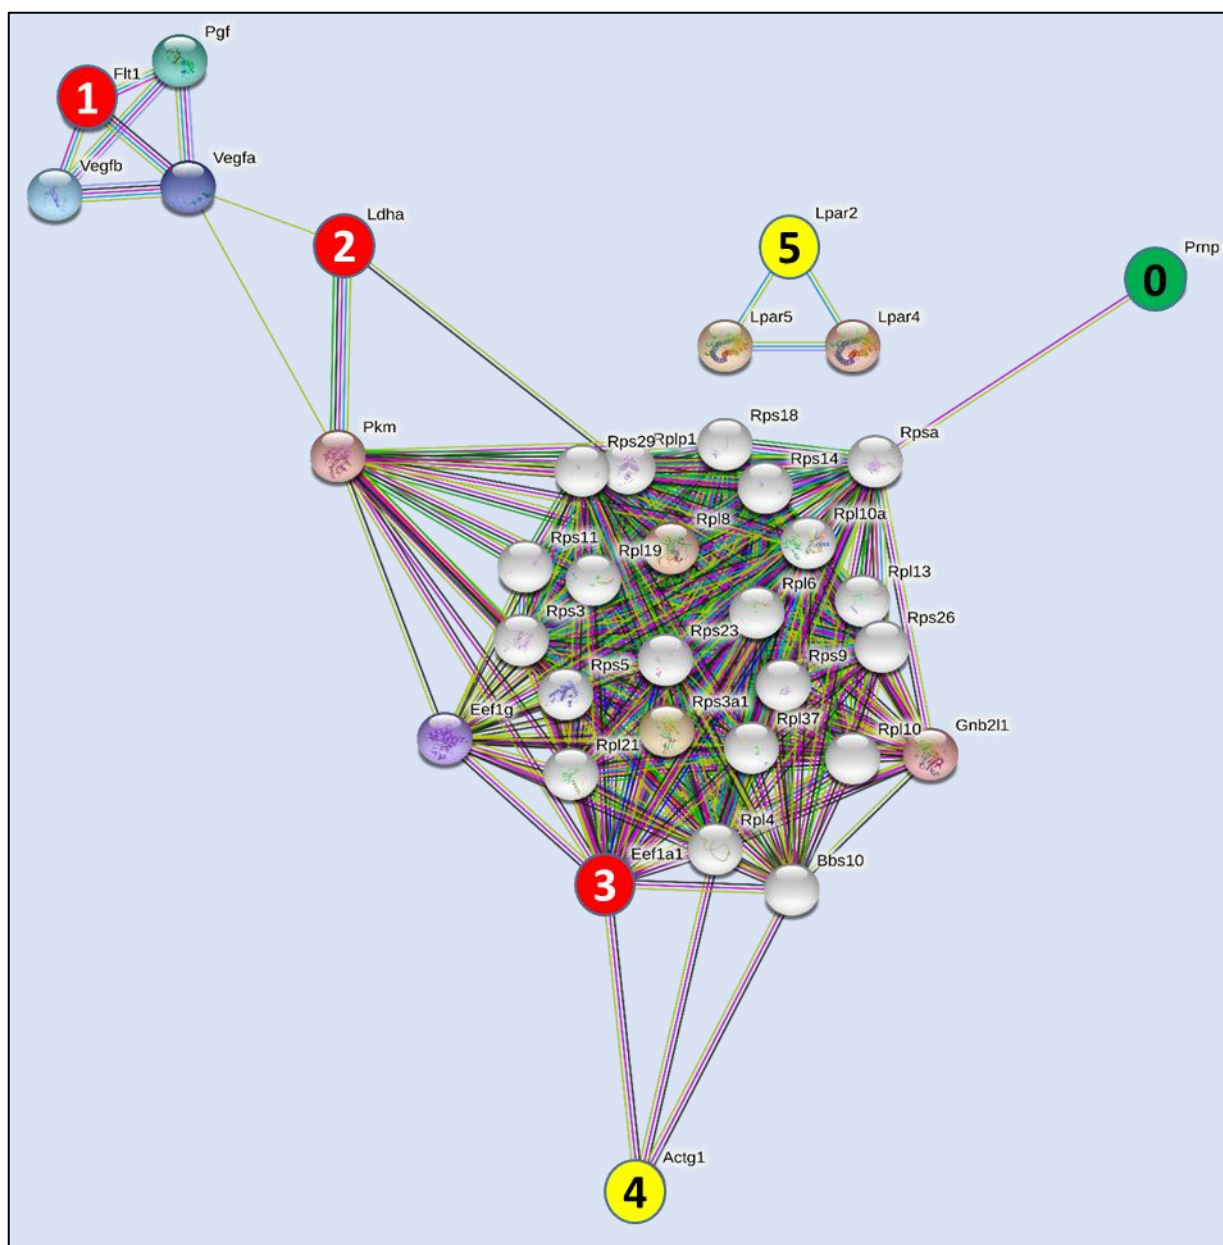

**Figure S2:** Protein-protein interaction of the identified 5 allergenic genes following direct antibody treatment (DAT) from mouse primary neuron (MPN) in comparison with 3F4 antibody treated cells. Protein-protein interaction analysis was performed using STRING v11.0 server. The *Mus Musculus* database was used as the host organism for the identification of protein interactions. Interaction among the allergenic proteins (numbered 1, 2, 3, 4 & 5) and with PrPC (numbered 0) following direct antibody treatment, where red and yellow color indicate the downregulated and upregulated genes, respectively and green color represents the cellular prion protein PrPC.

**Table S4:** Properties of the identified proteins following direct microglia treatment (DMT). The properties were identified by Progenesis Software after the LC-MS analysis. Selected 113 proteins have been highlighted as bold.

| Accession         | Peptides  | Unique peptides | Confidence score | Anova (p)       | q Value         | Max fold change | Highest Mean | Lowest Mean | Description                                                                   |
|-------------------|-----------|-----------------|------------------|-----------------|-----------------|-----------------|--------------|-------------|-------------------------------------------------------------------------------|
| <b>Q62108</b>     | <b>7</b>  | <b>2</b>        | <b>42.9</b>      | <b>6.61E-11</b> | <b>6.85E-10</b> | <b>α</b>        | <b>DMT</b>   | <b>CTL</b>  | <b>Disks large homolog 4 GN=Dlg4</b>                                          |
| Q921I1            | 4         | 2               | 28.8             | 0.081746        | 0.044888        | α               | DMT          | CTL         | Serotransferrin GN=Tf                                                         |
| Q3UFZ6            | 6         | 2               | 36.3             | 0               | 0               | α               | DMT          | CTL         | Caprin-1 dimer domain-containing protein (Fragment) GN=Caprin1                |
| Q0VGM9            | 7         | 3               | 37               | 2.22E-16        | 1.16E-14        | α               | DMT          | CTL         | Regulator of telomere elongation helicase 1 GN=Rtel1                          |
| J3QQ40            | 2         | 2               | 10.6             | 0.225732        | 0.104893        | α               | DMT          | CTL         | Torsin-1A-interacting protein 1 GN=Tor1aip1                                   |
| D3Z601            | 6         | 2               | 34.4             | 0.596358        | 0.223713        | α               | DMT          | CTL         | Calsyntenin-3 GN=Clstn3                                                       |
| B7ZNM3            | 5         | 3               | 31.3             | 1.14E-06        | 2.94E-06        | α               | DMT          | CTL         | NAD(P)(+)-arginine ADP-ribosyltransferase GN=Art3                             |
| A0A140LIX0        | 4         | 2               | 20               | 3.71E-08        | 1.49E-07        | α               | DMT          | CTL         | A-kinase anchor protein 13 (Fragment) GN=Akap13                               |
| A0A087WP13        | 5         | 2               | 24.9             | 0               | 0               | α               | DMT          | CTL         | Pleckstrin homology domain-containing family A member 6 (Fragment) GN=Plekha6 |
| F8VQF9            | 3         | 2               | 13.4             | 8.88E-16        | 4.45E-14        | 5510            | DMT          | CTL         | Trafficking protein particle complex subunit 10 GN=Trappc10                   |
| <b>A0A1L1SSA4</b> | <b>20</b> | <b>8</b>        | <b>100</b>       | <b>3.06E-08</b> | <b>1.26E-07</b> | <b>3580</b>     | <b>CTL</b>   | <b>DMT</b>  | <b>Centrosomal protein of 164 kDa GN=Cep164</b>                               |
| Q8C5G4            | 2         | 2               | 11.1             | 1.66E-10        | 1.46E-09        | 1400            | DMT          | CTL         | Uncharacterized protein GN=4930451G09Rik                                      |
| <b>A9C491</b>     | <b>12</b> | <b>4</b>        | <b>56.7</b>      | <b>5E-08</b>    | <b>1.92E-07</b> | <b>1210</b>     | <b>CTL</b>   | <b>DMT</b>  | <b>Cullin 7 GN=Cul7</b>                                                       |
| <b>A2AST1</b>     | <b>17</b> | <b>6</b>        | <b>110</b>       | <b>6.66E-15</b> | <b>2.55E-13</b> | <b>1180</b>     | <b>DMT</b>   | <b>CTL</b>  | <b>Coiled-coil domain-containing 141 GN=Ccdc141</b>                           |
| Q8BLR6            | 2         | 2               | 10.4             | 3.08E-10        | 2.54E-09        | 530             | DMT          | CTL         | Uncharacterized protein (Fragment)                                            |
| <b>A2RTI3</b>     | <b>8</b>  | <b>2</b>        | <b>51.3</b>      | <b>3.27E-07</b> | <b>1.01E-06</b> | <b>443</b>      | <b>DMT</b>   | <b>CTL</b>  | <b>Legumain GN=Lgmn</b>                                                       |
| Q99JF8            | 5         | 2               | 30.7             | 2.47E-12        | 4.05E-11        | 353             | DMT          | CTL         | PC4 and SFRS1-interacting protein GN=Psp1                                     |
| Q3UPH7            | 7         | 2               | 36.2             | 1.36E-11        | 1.81E-10        | 292             | DMT          | CTL         | Rho guanine nucleotide exchange factor 40 GN=Arhgef40                         |
| Q6ZPK7            | 5         | 2               | 26.8             | 1E-08           | 4.92E-08        | 275             | DMT          | CTL         | Lateral signaling target protein 2 homolog GN=Zfyve28                         |
| <b>Q9QXL1</b>     | <b>36</b> | <b>2</b>        | <b>200</b>       | <b>1.48E-09</b> | <b>9.64E-09</b> | <b>252</b>      | <b>DMT</b>   | <b>CTL</b>  | <b>Kinesin-like protein KIF21B GN=Kif21b</b>                                  |
| <b>F8WHT3</b>     | <b>16</b> | <b>3</b>        | <b>96</b>        | <b>5.32E-10</b> | <b>3.88E-09</b> | <b>249</b>      | <b>DMT</b>   | <b>CTL</b>  | <b>Protein PRRC2B GN=Prcc2b</b>                                               |
| <b>Q9CVR0</b>     | <b>32</b> | <b>2</b>        | <b>386</b>       | <b>1.68E-06</b> | <b>4.1E-06</b>  | <b>237</b>      | <b>CTL</b>   | <b>DMT</b>  | <b>Tubulin beta chain (Fragment) GN=Tubb4b</b>                                |
| <b>Q3TWW0</b>     | <b>61</b> | <b>2</b>        | <b>865</b>       | <b>0.000478</b> | <b>0.000553</b> | <b>221</b>      | <b>DMT</b>   | <b>CTL</b>  | <b>IF rod domain-containing protein GN=Vim</b>                                |
| <b>P62717</b>     | <b>14</b> | <b>3</b>        | <b>93.6</b>      | <b>1.86E-12</b> | <b>3.24E-11</b> | <b>206</b>      | <b>DMT</b>   | <b>CTL</b>  | <b>60S ribosomal protein L18a GN=Rpl18a</b>                                   |
| <b>Q8CHC7</b>     | <b>9</b>  | <b>2</b>        | <b>54.1</b>      | <b>2.13E-09</b> | <b>1.31E-08</b> | <b>200</b>      | <b>DMT</b>   | <b>CTL</b>  | <b>MKIAA0864 protein (Fragment) GN=Mprrip</b>                                 |
| <b>E9PZM4</b>     | <b>9</b>  | <b>2</b>        | <b>46.6</b>      | <b>2.93E-09</b> | <b>1.69E-08</b> | <b>189</b>      | <b>DMT</b>   | <b>CTL</b>  | <b>Chromodomain-helicase-DNA-binding protein 2 GN=Chd2</b>                    |
| E9Q5P0            | 3         | 2               | 16.9             | 0.00079         | 0.000852        | 158             | DMT          | CTL         | Serine protease hepsin GN=Hpn                                                 |
| A1L2Z3            | 5         | 2               | 29.3             | 0.000681        | 0.000751        | 153             | DMT          | CTL         | C230096C10Rik protein GN=Emc1                                                 |
| O54775            | 2         | 2               | 16.6             | 7.78E-11        | 7.86E-10        | 152             | DMT          | CTL         | WNT1-inducible-signaling pathway protein 1 GN=Wisp1                           |
| B7ZNG2            | 3         | 3               | 14.7             | 1.81E-08        | 8.16E-08        | 135             | DMT          | CTL         | Ttc18 protein GN=Cfap70                                                       |
| B1AVK5            | 5         | 3               | 34.2             | 1.6E-06         | 3.95E-06        | 131             | DMT          | CTL         | Collagen_type IV_alpha 6 GN=Col4a6                                            |
| <b>Q91WD7</b>     | <b>11</b> | <b>2</b>        | <b>65.9</b>      | <b>3.8E-05</b>  | <b>6.26E-05</b> | <b>124</b>      | <b>DMT</b>   | <b>CTL</b>  | <b>Kinesin-like protein KIF18A GN=Kif18a</b>                                  |
| <b>D3YTQ3</b>     | <b>13</b> | <b>2</b>        | <b>131</b>       | <b>6E-15</b>    | <b>2.37E-13</b> | <b>117</b>      | <b>DMT</b>   | <b>CTL</b>  | <b>Heterogeneous nuclear ribonucleoprotein D-like GN=Hnrnpdl</b>              |
| <b>Q8VDC1</b>     | <b>10</b> | <b>2</b>        | <b>64.5</b>      | <b>9.25E-07</b> | <b>2.5E-06</b>  | <b>115</b>      | <b>CTL</b>   | <b>DMT</b>  | <b>FYVE and coiled-coil domain-containing protein 1 GN=Fyco1</b>              |
| E5RKG4            | 6         | 3               | 34.2             | 0.011904        | 0.008784        | 109             | DMT          | CTL         | Scavenger receptor FEEL-2e GN=Stab2                                           |
| E9JGN0            | 4         | 2               | 21.6             | 0.000109        | 0.000154        | 105             | DMT          | CTL         | DAP-kinase-related protein 1 beta isoform GN=Dapk2                            |
| Q3TEA8            | 6         | 2               | 32.3             | 4.78E-10        | 3.58E-09        | 97.8            | DMT          | CTL         | Heterochromatin protein 1-binding protein 3 GN=Hp1bp3                         |
| A0A097BW18        | 3         | 2               | 16.3             | 1.19E-05        | 2.28E-05        | 90.6            | DMT          | CTL         | Periostin isoform M1 GN=Postn                                                 |
| Q3ZAT5            | 3         | 2               | 15.8             | 4.1E-11         | 4.55E-10        | 83.4            | DMT          | CTL         | One cut domain family member GN=Onecut2                                       |
| <b>Q3UKW2</b>     | <b>12</b> | <b>2</b>        | <b>107</b>       | <b>2.01E-06</b> | <b>4.85E-06</b> | <b>80.5</b>     | <b>DMT</b>   | <b>CTL</b>  | <b>Calmodulin-1 GN=Calm1</b>                                                  |
| Q0PD40            | 4         | 2               | 27               | 2.9E-10         | 2.42E-09        | 72.8            | DMT          | CTL         | Rab15 GN=Rab15                                                                |
| <b>A0A1L1SSN6</b> | <b>33</b> | <b>5</b>        | <b>363</b>       | <b>4.84E-12</b> | <b>7.17E-11</b> | <b>71.5</b>     | <b>CTL</b>   | <b>DMT</b>  | <b>Pyruvate kinase PKM (Fragment) GN=Pkm</b>                                  |
| <b>P41230</b>     | <b>8</b>  | <b>2</b>        | <b>42.7</b>      | <b>5.23E-10</b> | <b>3.83E-09</b> | <b>66.5</b>     | <b>DMT</b>   | <b>CTL</b>  | <b>Lysine-specific demethylase 5C GN=Kdm5c</b>                                |
| <b>A0A1S6GWJ7</b> | <b>26</b> | <b>10</b>       | <b>157</b>       | <b>4.85E-11</b> | <b>5.31E-10</b> | <b>66</b>       | <b>DMT</b>   | <b>CTL</b>  | <b>Uncharacterized protein GN=Pi4ka</b>                                       |
| P45952            | 4         | 2               | 22.1             | 2.22E-16        | 1.16E-14        | 63.1            | DMT          | CTL         | Medium-chain specific acyl-CoA dehydrogenase_mitochondrial GN=Acadm           |
| Q91YL3            | 3         | 2               | 15.8             | 1.1E-14         | 3.98E-13        | 60.4            | DMT          | CTL         | Uridine-cytidine kinase-like 1 GN=Uck11                                       |

|                    |           |          |             |                 |                 |             |            |            |                                                                                  |
|--------------------|-----------|----------|-------------|-----------------|-----------------|-------------|------------|------------|----------------------------------------------------------------------------------|
| Q9CUU3             | 3         | 2        | 15.8        | 3.99E-09        | 2.16E-08        | 58.7        | DMT        | CTL        | Synaptonemal complex protein 2 GN=Syp2                                           |
| Q31129             | 3         | 2        | 21.4        | 8.39E-05        | 0.000123        | 56.4        | CTL        | DMT        | MHC class I cell surface glycoprotein GN=H2-T24                                  |
| A6H619             | 7         | 2        | 37.1        | 0.000541        | 0.000618        | 55.1        | DMT        | CTL        | PHD and RING finger domain-containing protein 1 GN=Phrf1                         |
| <b>Q9ES28</b>      | <b>10</b> | <b>2</b> | <b>63.1</b> | <b>6.76E-07</b> | <b>1.87E-06</b> | <b>50.8</b> | <b>DMT</b> | <b>CTL</b> | <b>Rho guanine nucleotide exchange factor 7 GN=Arhgef7</b>                       |
| Q8C6E1             | 4         | 2        | 21.3        | 2.22E-16        | 1.16E-14        | 49.6        | DMT        | CTL        | Apolipoprotein L 7c GN=Apol7c                                                    |
| <b>Q8R1B4</b>      | <b>15</b> | <b>2</b> | <b>95</b>   | <b>0.000999</b> | <b>0.00103</b>  | <b>48.3</b> | <b>CTL</b> | <b>DMT</b> | <b>Eukaryotic translation initiation factor 3 subunit C GN=Eif3c</b>             |
| Q6XBG3             | 6         | 3        | 29          | 3.92E-07        | 1.18E-06        | 47          | CTL        | DMT        | ATP-binding cassette transporter sub-family A member 14 GN=Abca14                |
| <b>A2AFF6</b>      | <b>12</b> | <b>3</b> | <b>65.2</b> | <b>1.15E-09</b> | <b>7.8E-09</b>  | <b>46.2</b> | <b>DMT</b> | <b>CTL</b> | <b>Cohesin subunit SA-2 GN=Stag2</b>                                             |
| A0A2R8VJU7         | 4         | 2        | 27.8        | 9.93E-05        | 0.000142        | 45.9        | DMT        | CTL        | Septin 12 GN=Sept12                                                              |
| Q8C4B1             | 2         | 2        | 11.1        | 1.98E-08        | 8.86E-08        | 44.7        | DMT        | CTL        | Uncharacterized protein GN=Larp1b                                                |
| <b>A0A0N4SUT9</b>  | <b>11</b> | <b>3</b> | <b>62.3</b> | <b>3.8E-10</b>  | <b>2.98E-09</b> | <b>44.7</b> | <b>DMT</b> | <b>CTL</b> | <b>Peregrin GN=Brpf1</b>                                                         |
| F6UAC8             | 2         | 2        | 9.4         | 0.001663        | 0.001613        | 44.4        | CTL        | DMT        | Prolow-density lipoprotein receptor-related protein 1 (Fragment) GN=Lrp1         |
| <b>P03995</b>      | <b>20</b> | <b>2</b> | <b>153</b>  | <b>2.35E-09</b> | <b>1.41E-08</b> | <b>44.3</b> | <b>DMT</b> | <b>CTL</b> | <b>Glial fibrillary acidic protein GN=Gfap</b>                                   |
| <b>S4R2E2</b>      | <b>9</b>  | <b>3</b> | <b>60.1</b> | <b>3.37E-10</b> | <b>2.73E-09</b> | <b>42.3</b> | <b>DMT</b> | <b>CTL</b> | <b>Protein PRRC2C (Fragment) GN=Prrc2c</b>                                       |
| <b>A0A2I3BQG2</b>  | <b>14</b> | <b>2</b> | <b>71.4</b> | <b>8E-05</b>    | <b>0.000119</b> | <b>41.5</b> | <b>DMT</b> | <b>CTL</b> | <b>Crystallin beta-gamma domain-containing 2 GN=Crybg2</b>                       |
| <b>K3W4P2</b>      | <b>43</b> | <b>8</b> | <b>228</b>  | <b>9.03E-09</b> | <b>4.55E-08</b> | <b>41.3</b> | <b>DMT</b> | <b>CTL</b> | <b>Integrator complex subunit 1 GN=Ints1</b>                                     |
| <b>Q3T9T5</b>      | <b>8</b>  | <b>2</b> | <b>51.3</b> | <b>0.02772</b>  | <b>0.017929</b> | <b>41</b>   | <b>DMT</b> | <b>CTL</b> | <b>Uncharacterized protein (Fragment) GN=Cd22</b>                                |
| <b>D3YWM8</b>      | <b>10</b> | <b>3</b> | <b>56.5</b> | <b>4.86E-07</b> | <b>1.41E-06</b> | <b>40.8</b> | <b>DMT</b> | <b>CTL</b> | <b>Semaphorin-6A GN=Sema6a</b>                                                   |
| Q32NZ6             | 2         | 2        | 11          | 2.49E-13        | 6.13E-12        | 40.2        | CTL        | DMT        | Transmembrane channel-like protein 5 GN=Tmc5                                     |
| Q3U0X6             | 4         | 2        | 20.3        | 0.000921        | 0.000968        | 39.5        | DMT        | CTL        | Zinc finger protein 217 GN=Zfp217                                                |
| <b>P14152</b>      | <b>28</b> | <b>2</b> | <b>248</b>  | <b>9.76E-10</b> | <b>6.73E-09</b> | <b>38.2</b> | <b>DMT</b> | <b>CTL</b> | <b>Malate dehydrogenase_cytoplasmic GN=Mdh1</b>                                  |
| <b>A0A498WG D8</b> | <b>11</b> | <b>3</b> | <b>92.4</b> | <b>1.15E-07</b> | <b>3.98E-07</b> | <b>37.9</b> | <b>CTL</b> | <b>DMT</b> | <b>Thioredoxin-like protein 1 GN=Txn1</b>                                        |
| <b>Q3TLE5</b>      | <b>33</b> | <b>3</b> | <b>255</b>  | <b>1.01E-13</b> | <b>2.69E-12</b> | <b>36.6</b> | <b>DMT</b> | <b>CTL</b> | <b>S5 DRBM domain-containing protein GN=Rps2</b>                                 |
| F6Z6C6             | 3         | 2        | 16.3        | 3.15E-07        | 9.74E-07        | 36.1        | CTL        | DMT        | Interferon regulatory factor 5 GN=Irf5                                           |
| Q6P5U7             | 6         | 3        | 32.2        | 0.002113        | 0.001984        | 35.9        | DMT        | CTL        | NACHT and WD repeat domain-containing protein 2 GN=Nwd2                          |
| Q8C4X2             | 3         | 2        | 16.6        | 2.36E-10        | 2.01E-09        | 35.7        | DMT        | CTL        | Casein kinase I isoform gamma-3 GN=Csnk1g3                                       |
| Q9Z2F2             | 4         | 2        | 22.8        | 2.19E-13        | 5.49E-12        | 35.2        | DMT        | CTL        | 2'-5'-oligoadenylate synthase-like protein 2 GN=Oasl2                            |
| A0A0E4HJ81         | 3         | 2        | 21.5        | 0.000272        | 0.000339        | 35.1        | DMT        | CTL        | Katanin p60 ATPase-containing subunit A-like 2 GN=Katnal2                        |
| <b>Q3V2C6</b>      | <b>18</b> | <b>3</b> | <b>173</b>  | <b>1.11E-08</b> | <b>5.32E-08</b> | <b>34.5</b> | <b>DMT</b> | <b>CTL</b> | <b>IF rod domain-containing protein GN=Des</b>                                   |
| B2RUH4             | 4         | 2        | 26.7        | 0.000361        | 0.000432        | 34.5        | DMT        | CTL        | Pcdhb5 protein GN=Pcdhb5                                                         |
| G3UW86             | 5         | 2        | 26.7        | 7.14E-08        | 2.68E-07        | 34.4        | DMT        | CTL        | Protein regulator of cytokinesis 1 GN=Prc1                                       |
| <b>A2RSQ0</b>      | <b>11</b> | <b>4</b> | <b>57.1</b> | <b>5.61E-10</b> | <b>4.04E-09</b> | <b>33.9</b> | <b>CTL</b> | <b>DMT</b> | <b>DENN domain-containing protein 5B GN=Dennd5b</b>                              |
| <b>Q3U094</b>      | <b>16</b> | <b>2</b> | <b>133</b>  | <b>1.32E-06</b> | <b>3.32E-06</b> | <b>32.7</b> | <b>DMT</b> | <b>CTL</b> | <b>Actin-related protein 2/3 complex subunit GN=Arpc1b</b>                       |
| <b>Q62240</b>      | <b>11</b> | <b>3</b> | <b>63.9</b> | <b>8.71E-08</b> | <b>3.18E-07</b> | <b>31.6</b> | <b>DMT</b> | <b>CTL</b> | <b>Lysine-specific demethylase 5D GN=Kdm5d</b>                                   |
| Q6ZQA5             | 3         | 2        | 15.6        | 2.48E-08        | 1.06E-07        | 31.5        | DMT        | CTL        | MKIAA0467 protein (Fragment) GN=mKIAA0467                                        |
| <b>A0A286YD12</b>  | <b>5</b>  | <b>2</b> | <b>40.5</b> | <b>0.019522</b> | <b>0.013368</b> | <b>31.4</b> | <b>DMT</b> | <b>CTL</b> | <b>Neurolysin_mitochondrial GN=Nln</b>                                           |
| <b>Q8C555</b>      | <b>14</b> | <b>2</b> | <b>77.5</b> | <b>1.74E-09</b> | <b>1.08E-08</b> | <b>31.2</b> | <b>DMT</b> | <b>CTL</b> | <b>Uncharacterized protein</b>                                                   |
| E9Q7D5             | 6         | 3        | 31.3        | 7.61E-10        | 5.3E-09         | 30.8        | DMT        | CTL        | Rho guanine nucleotide exchange factor 5 GN=Arhgef5                              |
| A2BI45             | 3         | 2        | 23          | 0.010774        | 0.00806         | 30.6        | DMT        | CTL        | X-linked lymphocyte-regulated 5A GN=Xlr5a                                        |
| <b>E9Q0J5</b>      | <b>9</b>  | <b>2</b> | <b>50.7</b> | <b>0.013141</b> | <b>0.009519</b> | <b>30.1</b> | <b>CTL</b> | <b>DMT</b> | <b>Kinesin-like protein KIF21A GN=Kif21a</b>                                     |
| Q148T5             | 5         | 2        | 26.6        | 0.005851        | 0.004786        | 30          | CTL        | DMT        | Tnc protein GN=Tnc                                                               |
| <b>A0A1W2P711</b>  | <b>8</b>  | <b>2</b> | <b>45.6</b> | <b>5.95E-05</b> | <b>9.32E-05</b> | <b>29.2</b> | <b>DMT</b> | <b>CTL</b> | <b>Melanoma inhibitory activity protein 2 GN=Mia2</b>                            |
| <b>D3Z1N4</b>      | <b>21</b> | <b>9</b> | <b>112</b>  | <b>3.83E-07</b> | <b>1.16E-06</b> | <b>28.3</b> | <b>CTL</b> | <b>DMT</b> | <b>Protein polybromo-1 GN=Pbrm1</b>                                              |
| <b>O89054</b>      | <b>16</b> | <b>2</b> | <b>201</b>  | <b>2.63E-05</b> | <b>4.58E-05</b> | <b>28.2</b> | <b>DMT</b> | <b>CTL</b> | <b>Cytoskeletal beta-actin (Fragment) GN=Actb</b>                                |
| Q0PD15             | 5         | 3        | 30.4        | 0.005907        | 0.004825        | 27.9        | CTL        | DMT        | Rab39A GN=Rab39                                                                  |
| E9QAC9             | 4         | 2        | 17.7        | 1.31E-05        | 2.47E-05        | 27.8        | DMT        | CTL        | Calcium-independent phospholipase A2-gamma GN=Pnpla8                             |
| A0A0R4J1H1         | 4         | 4        | 20          | 0.122918        | 0.063149        | 27.1        | DMT        | CTL        | RAD51-associated protein 1 GN=Rad51ap1                                           |
| G3UWG2             | 4         | 2        | 21.3        | 1.49E-07        | 5.05E-07        | 27.1        | DMT        | CTL        | T-lymphoma invasion and metastasis-inducing protein 1 GN=Tiam1                   |
| <b>A0A0A0MQ E8</b> | <b>21</b> | <b>7</b> | <b>122</b>  | <b>2.77E-07</b> | <b>8.78E-07</b> | <b>26.6</b> | <b>DMT</b> | <b>CTL</b> | <b>Rho GTPase-activating protein 21 GN=Arhgap21</b>                              |
| <b>J9S314</b>      | <b>16</b> | <b>5</b> | <b>85.7</b> | <b>2.63E-09</b> | <b>1.54E-08</b> | <b>25.7</b> | <b>CTL</b> | <b>DMT</b> | <b>Transient receptor potential cation channel_subfamily M_member 3 GN=Trpm3</b> |
| E9Q6E5             | 5         | 2        | 32.5        | 9.45E-07        | 2.54E-06        | 25.6        | DMT        | CTL        | Serine and arginine-rich-splicing factor 11 GN=Srsf11                            |
| Q3KN99             | 5         | 2        | 34.6        | 2.64E-09        | 1.55E-08        | 25.1        | CTL        | DMT        | Synapsin III GN=Syn3                                                             |

|            |    |    |      |          |          |      |     |     |                                                                                              |
|------------|----|----|------|----------|----------|------|-----|-----|----------------------------------------------------------------------------------------------|
| A0A087WPL5 | 36 | 11 | 226  | 0        | 0        | 25   | CTL | DMT | ATP-dependent RNA helicase A GN=Dhx9                                                         |
| Q61481     | 10 | 2  | 60.6 | 4.35E-14 | 1.26E-12 | 24.7 | CTL | DMT | Calcium/calmodulin-dependent 3' 5'-cyclic nucleotide phosphodiesterase 1A GN=Pde1a           |
| B2RSV4     | 11 | 2  | 57.4 | 3.62E-10 | 2.86E-09 | 24.1 | DMT | CTL | Splicing factor 3b_subunit 3 GN=Sf3b3                                                        |
| E9QK89     | 10 | 3  | 52.9 | 1.07E-12 | 2.18E-11 | 23.9 | DMT | CTL | Mediator of DNA damage checkpoint protein 1 GN=Mdcl1                                         |
| P30415     | 3  | 2  | 16.9 | 0.803512 | 0.278568 | 23.6 | DMT | CTL | NK-tumor recognition protein GN=Nktr                                                         |
| Q8K485     | 2  | 2  | 16.8 | 2.54E-07 | 8.13E-07 | 23.3 | DMT | CTL | BTB/POZ domain-containing protein KCTD11 GN=Kctd11                                           |
| A2AL50     | 9  | 2  | 59.6 | 0.001093 | 0.001114 | 23   | DMT | CTL | Alkylglycerone-phosphate synthase GN=Agps                                                    |
| O35129     | 18 | 3  | 160  | 1.45E-09 | 9.48E-09 | 22.8 | CTL | DMT | Prohibitin-2 GN=Phb2                                                                         |
| Q8C0V9     | 4  | 3  | 22.6 | 0.005808 | 0.004757 | 22.6 | DMT | CTL | FERM domain-containing protein 6 GN=Frmd6                                                    |
| Q80TB9     | 2  | 2  | 10.9 | 4.26E-06 | 9.29E-06 | 22.4 | DMT | CTL | MKIAA1569 protein (Fragment) GN=mKIAA1569                                                    |
| H7BX69     | 4  | 2  | 23.1 | 0.004424 | 0.00375  | 22.4 | CTL | DMT | Zinc finger and BTB domain-containing protein 18 GN=Zbtb18                                   |
| A2A9L3     | 2  | 2  | 10   | 2.02E-06 | 4.85E-06 | 22.2 | DMT | CTL | Serine/threonine-protein kinase PDIK1L GN=Pdik1l                                             |
| O08605     | 7  | 3  | 61.6 | 2.22E-05 | 3.93E-05 | 21.5 | DMT | CTL | MAP kinase-interacting serine/threonine-protein kinase 1 GN=Mknk1                            |
| G3X932     | 7  | 4  | 45.6 | 0.000202 | 0.000261 | 21.3 | DMT | CTL | Rho GTPase-activating protein 39 GN=Arhgap39                                                 |
| Q9Z2Q6     | 7  | 2  | 36.7 | 2.04E-08 | 9E-08    | 21   | CTL | DMT | Septin-5 GN=Septin5                                                                          |
| B2RXY1     | 5  | 2  | 36.7 | 1.74E-08 | 7.86E-08 | 21   | DMT | CTL | Spock1 protein GN=Spock1                                                                     |
| A2AP18     | 17 | 6  | 99.8 | 0.00152  | 0.001494 | 20.9 | DMT | CTL | 1-phosphatidylinositol 4_5-bisphosphate phosphodiesterase eta-2 GN=Plch2                     |
| A0A0N4SVP8 | 25 | 2  | 214  | 6.74E-05 | 0.000103 | 20.4 | DMT | CTL | Eukaryotic translation initiation factor 4A3-like 2 GN=Eif4a3l2                              |
| P70691     | 9  | 3  | 60.6 | 5.71E-11 | 6.06E-10 | 20.3 | DMT | CTL | UDP-glucuronosyltransferase 1-2 GN=Ugt1a2                                                    |
| F8VPQ4     | 8  | 3  | 49.6 | 0.00027  | 0.000337 | 19.8 | DMT | CTL | SLIT-ROBO Rho GTPase-activating protein 3 GN=Srgap3                                          |
| A0A338P6D4 | 3  | 2  | 16.5 | 1.25E-06 | 3.18E-06 | 19.6 | DMT | CTL | Protein HEG homolog 1 GN=Heg1                                                                |
| B7ZBV8     | 3  | 2  | 16.6 | 1.91E-06 | 4.64E-06 | 19.6 | DMT | CTL | Potassium voltage-gated channel subfamily KQT member 2 GN=Kcnq2                              |
| Q8K441     | 7  | 5  | 41.9 | 0.001531 | 0.001503 | 19.3 | DMT | CTL | ATP-binding cassette sub-family A member 6 GN=Abca6                                          |
| Q99JW2     | 10 | 2  | 62.7 | 0.015458 | 0.010943 | 18.9 | CTL | DMT | Aminoacylase-1 GN=Acy1                                                                       |
| A0A571BEC4 | 14 | 3  | 96.5 | 2.95E-05 | 5.05E-05 | 18.8 | DMT | CTL | Ligand-dependent nuclear receptor corepressor-like protein GN=Lcor1                          |
| B1AZQ9     | 5  | 2  | 26.6 | 0.000653 | 0.000729 | 18.5 | DMT | CTL | Kelch-like 4 GN=Klhl4                                                                        |
| F6QKE4     | 6  | 3  | 30   | 3.06E-07 | 9.55E-07 | 18.3 | DMT | CTL | Immunoglobulin-like and fibronectin type III domain-containing protein 1 (Fragment) GN=Igfn1 |
| A0A0N4SUM8 | 4  | 3  | 29.4 | 0.000215 | 0.000276 | 18.1 | DMT | CTL | Predicted gene 45140 GN=Gm45140                                                              |
| G3V011     | 7  | 2  | 46   | 0.319898 | 0.13853  | 18   | DMT | CTL | Unconventional myosin-If GN=Myo1f                                                            |
| Q3ULB1     | 2  | 2  | 10.1 | 0.113033 | 0.059    | 18   | DMT | CTL | Testin GN=Tes                                                                                |
| P59114     | 6  | 4  | 39.6 | 0.009768 | 0.007409 | 17.8 | DMT | CTL | mRNA (2'-O-methyladenosine-N(6)-)-methyltransferase GN=Pcif1                                 |
| G5E8L2     | 3  | 2  | 16.7 | 2.34E-11 | 2.83E-10 | 17.7 | DMT | CTL | Nucleolysin TIA-1 GN=Tia1                                                                    |
| Q5CZY9     | 15 | 4  | 122  | 2.83E-09 | 1.64E-08 | 17.6 | CTL | DMT | Rps16 protein GN=Rps16                                                                       |
| P16882     | 4  | 2  | 27.7 | 2.72E-09 | 1.58E-08 | 17.5 | CTL | DMT | Growth hormone receptor GN=Ghr                                                               |
| Q3UFM6     | 2  | 2  | 10.3 | 2.26E-05 | 3.99E-05 | 17   | CTL | DMT | Splicing factor ESS-2 homolog GN=Ess2                                                        |
| E9Q9F7     | 19 | 2  | 119  | 6.02E-07 | 1.7E-06  | 17   | DMT | CTL | Coiled-coil domain-containing 146 GN=Ccdc146                                                 |
| Q3UJU3     | 14 | 3  | 84.3 | 0.000331 | 0.000402 | 16.9 | DMT | CTL | E3 ubiquitin-protein ligase GN=Wwp2                                                          |
| Q9D2H5     | 4  | 2  | 25.6 | 2.63E-13 | 6.34E-12 | 16.9 | DMT | CTL | Tripartite motif-containing protein 42 GN=Trim42                                             |
| A0A1L1SS82 | 8  | 2  | 45.2 | 4.83E-06 | 1.03E-05 | 16.5 | DMT | CTL | Coiled-coil domain-containing 7A GN=Ccdc7a                                                   |
| A6PWD2     | 40 | 10 | 238  | 1.17E-10 | 1.08E-09 | 16.5 | CTL | DMT | Forkhead-associated domain-containing protein 1 GN=Fhad1                                     |
| E9Q043     | 13 | 7  | 67.9 | 1.66E-09 | 1.06E-08 | 16.4 | CTL | DMT | Fibronectin type III domain-containing 1 GN=Fndc1                                            |
| A2RSY1     | 11 | 3  | 74.2 | 2.89E-05 | 4.96E-05 | 16.3 | DMT | CTL | KAT8 regulatory NSL complex subunit 3 GN=Kansl3                                              |
| P35821     | 4  | 2  | 20.1 | 1.46E-05 | 2.73E-05 | 16.1 | DMT | CTL | Tyrosine-protein phosphatase non-receptor type 1 GN=Ptpn1                                    |
| P48722     | 19 | 5  | 123  | 4.2E-12  | 6.29E-11 | 16.1 | CTL | DMT | Heat shock 70 kDa protein 4L GN=Hspa4l                                                       |
| Q3UZ18     | 8  | 2  | 50.9 | 2E-05    | 3.59E-05 | 15.6 | DMT | CTL | Little elongation complex subunit 2 GN=Ice2                                                  |
| Q9RIL5     | 3  | 2  | 13   | 0.000267 | 0.000335 | 15.6 | CTL | DMT | Microtubule-associated serine/threonine-protein kinase 1 GN=Mast1                            |
| D3Z5P0     | 3  | 2  | 16.3 | 1.85E-07 | 6.15E-07 | 15.3 | DMT | CTL | Serine/threonine-protein kinase BRSK1 GN=Brsk1                                               |
| P28828     | 6  | 3  | 30.2 | 2.48E-12 | 4.05E-11 | 15.2 | DMT | CTL | Receptor-type tyrosine-protein phosphatase mu GN=Ptpm                                        |
| G3UX23     | 8  | 3  | 62.1 | 9.7E-05  | 0.000139 | 15.1 | DMT | CTL | Bifunctional UDP-N-acetylglucosamine 2-epimerase/N-acetylmannosamine kinase GN=Gne           |
| Q3UJM1     | 6  | 2  | 32.8 | 2.6E-06  | 6.03E-06 | 15.1 | DMT | CTL | Uncharacterized protein GN=Trmt2a                                                            |
| Q3TM31     | 9  | 2  | 43.2 | 0.043612 | 0.026424 | 14.8 | DMT | CTL | TIR domain-containing protein GN=Tlr3                                                        |
| D3YWJ9     | 3  | 2  | 20.7 | 0.0001   | 0.000143 | 14.6 | DMT | CTL | Ras-associating and dilute domain-containing protein GN=Radil                                |

|                    |           |           |             |                 |                 |             |            |            |                                                                                                   |
|--------------------|-----------|-----------|-------------|-----------------|-----------------|-------------|------------|------------|---------------------------------------------------------------------------------------------------|
| E9Q980             | 6         | 2         | 29.6        | 0.003349        | 0.00295         | 14.5        | CTL        | DMT        | Zinc finger protein 788 GN=Zfp788                                                                 |
| A0A1Y7VN40         | 3         | 2         | 15          | 6.57E-05        | 0.000101        | 14.5        | DMT        | CTL        | Predicted gene_30302 GN=Gm30302                                                                   |
| <b>Q4VAA2</b>      | <b>11</b> | <b>3</b>  | <b>86.8</b> | <b>0.000251</b> | <b>0.000317</b> | <b>14.4</b> | <b>DMT</b> | <b>CTL</b> | <b>Protein CDV3 GN=Cdv3</b>                                                                       |
| Q9JL35             | 8         | 2         | 37.8        | 0.004234        | 0.003618        | 14.3        | CTL        | DMT        | High mobility group nucleosome-binding domain-containing protein 5 GN=Hmgn5                       |
| Q9QZS0             | 6         | 2         | 33.2        | 1.17E-06        | 3E-06           | 14.3        | DMT        | CTL        | Collagen alpha-3(IV) chain GN=Col4a3                                                              |
| <b>P11031</b>      | <b>8</b>  | <b>2</b>  | <b>74.5</b> | <b>0.000382</b> | <b>0.000454</b> | <b>14.2</b> | <b>CTL</b> | <b>DMT</b> | <b>Activated RNA polymerase II transcriptional coactivator p15 GN=Sub1</b>                        |
| A2AWP6             | 7         | 4         | 33.6        | 0.061162        | 0.035085        | 14.1        | DMT        | CTL        | Rho guanine nucleotide exchange factor 10-like protein GN=Arhgef10l                               |
| <b>Q6P5D8</b>      | <b>36</b> | <b>15</b> | <b>219</b>  | <b>2.07E-08</b> | <b>9.1E-08</b>  | <b>14.1</b> | <b>CTL</b> | <b>DMT</b> | <b>Structural maintenance of chromosomes flexible hinge domain-containing protein 1 GN=Smchd1</b> |
| <b>A4GZ26</b>      | <b>18</b> | <b>3</b>  | <b>113</b>  | <b>4.3E-06</b>  | <b>9.34E-06</b> | <b>14</b>   | <b>CTL</b> | <b>DMT</b> | <b>ARF6 guanine nucleotide exchange factor IQArfGEF GN=Iqsec2</b>                                 |
| <b>A0A140T8S1</b>  | <b>9</b>  | <b>2</b>  | <b>59.4</b> | <b>3.99E-05</b> | <b>6.55E-05</b> | <b>14</b>   | <b>CTL</b> | <b>DMT</b> | <b>A-kinase anchor protein 9 (Fragment) GN=Akap9</b>                                              |
| <b>G3UWH9</b>      | <b>7</b>  | <b>3</b>  | <b>43.8</b> | <b>4.27E-08</b> | <b>1.68E-07</b> | <b>13.9</b> | <b>DMT</b> | <b>CTL</b> | <b>Conserved oligomeric Golgi complex subunit 4 (Fragment) GN=Cog4</b>                            |
| <b>Q8BUR4</b>      | <b>11</b> | <b>5</b>  | <b>60.1</b> | <b>2.23E-08</b> | <b>9.74E-08</b> | <b>13.8</b> | <b>CTL</b> | <b>DMT</b> | <b>Dedicator of cytokinesis protein 1 GN=Dock1</b>                                                |
| <b>Q3UTF4</b>      | <b>8</b>  | <b>2</b>  | <b>58.2</b> | <b>0.028192</b> | <b>0.018189</b> | <b>13.8</b> | <b>DMT</b> | <b>CTL</b> | <b>Zinc finger protein 114 GN=Zfp114</b>                                                          |
| B2RUH7             | 6         | 2         | 32.5        | 0.014046        | 0.010085        | 13.8        | CTL        | DMT        | Protocadherin beta 2 GN=Pcdhb2                                                                    |
| <b>A2AT37</b>      | <b>21</b> | <b>5</b>  | <b>127</b>  | <b>1.21E-10</b> | <b>1.1E-09</b>  | <b>13.8</b> | <b>DMT</b> | <b>CTL</b> | <b>Regulator of nonsense transcripts 2 GN=Upf2</b>                                                |
| A0A5F8MPP1         | 7         | 2         | 36.8        | 0.049383        | 0.029308        | 13.7        | DMT        | CTL        | RIKEN cDNA C530008M17 gene GN=C530008M17Rik                                                       |
| <b>Q78NA6</b>      | <b>16</b> | <b>5</b>  | <b>95.2</b> | <b>2.91E-13</b> | <b>6.9E-12</b>  | <b>13.5</b> | <b>DMT</b> | <b>CTL</b> | <b>V(D)J recombination-activating protein 1 GN=Rag1</b>                                           |
| <b>Q3UDU4</b>      | <b>41</b> | <b>6</b>  | <b>474</b>  | <b>7.91E-05</b> | <b>0.000118</b> | <b>13.5</b> | <b>CTL</b> | <b>DMT</b> | <b>L-lactate dehydrogenase GN=Ldha</b>                                                            |
| <b>Q7TS74</b>      | <b>11</b> | <b>3</b>  | <b>72.6</b> | <b>0.037331</b> | <b>0.023225</b> | <b>13.4</b> | <b>DMT</b> | <b>CTL</b> | <b>Cytoskeleton-associated protein 2-like GN=Ckap2l</b>                                           |
| E0CXC2             | 4         | 2         | 17.5        | 1.83E-12        | 3.24E-11        | 13.3        | DMT        | CTL        | E3 ubiquitin-protein ligase RNF8 GN=Gm28043                                                       |
| <b>B1ASZ3</b>      | <b>9</b>  | <b>2</b>  | <b>45.8</b> | <b>0.037514</b> | <b>0.023304</b> | <b>13.2</b> | <b>DMT</b> | <b>CTL</b> | <b>Glycerol kinase GN=Gk</b>                                                                      |
| Q5FWI3             | 5         | 2         | 29.4        | 2.25E-07        | 7.36E-07        | 13.1        | DMT        | CTL        | Cell surface hyaluronidase GN=Cemip2                                                              |
| J3QML2             | 5         | 2         | 27          | 0               | 0               | 13          | DMT        | CTL        | Canalicular multispecific organic anion transporter 2 GN=Abcc3                                    |
| <b>P02802</b>      | <b>7</b>  | <b>3</b>  | <b>66.1</b> | <b>0.004504</b> | <b>0.003806</b> | <b>12.8</b> | <b>CTL</b> | <b>DMT</b> | <b>Metallothionein-1 GN=Mt1</b>                                                                   |
| Q8CFL8             | 5         | 2         | 27.1        | 2.74E-05        | 4.74E-05        | 12.8        | CTL        | DMT        | Zinc finger SWIM domain-containing protein 3 GN=Zswim3                                            |
| <b>A0A1Y7VM E9</b> | <b>15</b> | <b>4</b>  | <b>93.5</b> | <b>4.62E-10</b> | <b>3.48E-09</b> | <b>12.8</b> | <b>CTL</b> | <b>DMT</b> | <b>Kinase D-interacting substrate 220 GN=Kidins220</b>                                            |
| <b>Q499F8</b>      | <b>9</b>  | <b>2</b>  | <b>63</b>   | <b>9.76E-06</b> | <b>1.93E-05</b> | <b>12.8</b> | <b>DMT</b> | <b>CTL</b> | <b>Zinc finger protein 445 GN=Zfp445</b>                                                          |
| G3XA14             | 3         | 2         | 17.3        | 4.99E-06        | 1.06E-05        | 12.7        | DMT        | CTL        | Aldo-keto reductase family 1_ member C-like GN=Akr1cl                                             |
| <b>A2A7F4</b>      | <b>10</b> | <b>3</b>  | <b>51.1</b> | <b>0.000105</b> | <b>0.000148</b> | <b>12.6</b> | <b>DMT</b> | <b>CTL</b> | <b>Rearranged L-myc fusion sequence GN=Rif</b>                                                    |
| <b>P06800</b>      | <b>6</b>  | <b>2</b>  | <b>41.1</b> | <b>6.11E-07</b> | <b>1.72E-06</b> | <b>12.5</b> | <b>DMT</b> | <b>CTL</b> | <b>Receptor-type tyrosine-protein phosphatase C GN=Ptprc</b>                                      |
| <b>E9Q0A4</b>      | <b>39</b> | <b>4</b>  | <b>216</b>  | <b>0.000263</b> | <b>0.000331</b> | <b>12.4</b> | <b>CTL</b> | <b>DMT</b> | <b>Kinesin-like protein KIF21B GN=Kif21b</b>                                                      |
| <b>B7ZCQ3</b>      | <b>5</b>  | <b>3</b>  | <b>49</b>   | <b>5.67E-05</b> | <b>8.94E-05</b> | <b>12.4</b> | <b>DMT</b> | <b>CTL</b> | <b>Non-histone chromosomal protein HMG-17 GN=Hmgn2</b>                                            |
| <b>Q499M4</b>      | <b>6</b>  | <b>2</b>  | <b>45.2</b> | <b>1.08E-09</b> | <b>7.36E-09</b> | <b>12.4</b> | <b>DMT</b> | <b>CTL</b> | <b>Tigger transposable element derived 5 GN=Tigd5</b>                                             |
| A0A571BE33         | 3         | 2         | 15          | 6.72E-14        | 1.9E-12         | 12.4        | DMT        | CTL        | von Willebrand factor A domain containing 3B GN=Vwa3b                                             |
| F6S7U1             | 7         | 4         | 35.7        | 1.59E-06        | 3.95E-06        | 12.3        | DMT        | CTL        | RAB6A-GEF complex partner protein 1 (Fragment) GN=Ric1                                            |
| E9PZJ4             | 6         | 2         | 34.3        | 1.13E-07        | 3.94E-07        | 12.3        | DMT        | CTL        | Bifunctional heparan sulfate N-deacetylase/N-sulfotransferase 3 GN=Ndst3                          |
| <b>Q9QWI6</b>      | <b>15</b> | <b>2</b>  | <b>93.8</b> | <b>2.31E-10</b> | <b>1.98E-09</b> | <b>12.2</b> | <b>DMT</b> | <b>CTL</b> | <b>SRC kinase signaling inhibitor 1 GN=Srcin1</b>                                                 |
| <b>Q9Z1Z0</b>      | <b>9</b>  | <b>4</b>  | <b>50.5</b> | <b>2.63E-11</b> | <b>3.09E-10</b> | <b>12.2</b> | <b>DMT</b> | <b>CTL</b> | <b>General vesicular transport factor p115 GN=Uso1</b>                                            |
| <b>S4R2T7</b>      | <b>11</b> | <b>6</b>  | <b>75.2</b> | <b>3.53E-11</b> | <b>4.03E-10</b> | <b>12.2</b> | <b>DMT</b> | <b>CTL</b> | <b>Ankyrin-2 (Fragment) GN=Ank2</b>                                                               |
| <b>B1AWQ3</b>      | <b>8</b>  | <b>3</b>  | <b>43.1</b> | <b>1.2E-10</b>  | <b>1.1E-09</b>  | <b>12.2</b> | <b>DMT</b> | <b>CTL</b> | <b>Espin GN=Espn</b>                                                                              |
| Q5NCH9             | 2         | 2         | 12.9        | 4.26E-05        | 6.93E-05        | 12.1        | DMT        | CTL        | Metabotropic glutamate receptor 6 GN=Grm6                                                         |
| D3YZ32             | 2         | 2         | 10.1        | 2.77E-08        | 1.17E-07        | 12.1        | CTL        | DMT        | Mitochondrial fission 1 protein GN=Fis1                                                           |
| A2AQJ8             | 3         | 2         | 14.5        | 4.12E-11        | 4.55E-10        | 12          | DMT        | CTL        | Neutral alpha-glucosidase C GN=Ganc                                                               |
| <b>Q9CX34</b>      | <b>13</b> | <b>3</b>  | <b>99.2</b> | <b>1.01E-10</b> | <b>9.5E-10</b>  | <b>12</b>   | <b>DMT</b> | <b>CTL</b> | <b>Protein SGT1 homolog GN=Sugt1</b>                                                              |
| Q9WUF3             | 28        | 10        | 171         | 4.59E-07        | 1.34E-06        | 11.9        | DMT        | CTL        | CASP8-associated protein 2 GN=Casp8ap2                                                            |
| <b>A0A3B2WCI 5</b> | <b>5</b>  | <b>2</b>  | <b>41.7</b> | <b>9.53E-13</b> | <b>2.04E-11</b> | <b>11.8</b> | <b>CTL</b> | <b>DMT</b> | <b>BICD family-like cargo adapter 2 GN=Bicld2</b>                                                 |
| <b>I7HJQ9</b>      | <b>8</b>  | <b>5</b>  | <b>43.6</b> | <b>4.71E-06</b> | <b>1.01E-05</b> | <b>11.5</b> | <b>DMT</b> | <b>CTL</b> | <b>Myotubularin-related protein 1 GN=Mtmr1</b>                                                    |
| <b>B2RWU3</b>      | <b>16</b> | <b>3</b>  | <b>96.1</b> | <b>2.2E-07</b>  | <b>7.2E-07</b>  | <b>11.5</b> | <b>CTL</b> | <b>DMT</b> | <b>Fanconi anemia_ complementation group A GN=Fanca</b>                                           |
| <b>A2A977</b>      | <b>12</b> | <b>2</b>  | <b>79.5</b> | <b>8.16E-07</b> | <b>2.22E-06</b> | <b>11.5</b> | <b>DMT</b> | <b>CTL</b> | <b>Cytochrome P450 4A10 GN=Cyp4a10</b>                                                            |
| <b>A0A0R4J2C 1</b> | <b>9</b>  | <b>5</b>  | <b>52.1</b> | <b>0.002787</b> | <b>0.002517</b> | <b>11.5</b> | <b>DMT</b> | <b>CTL</b> | <b>Amyloid-beta A4 precursor protein-binding family B member 1 GN=Apbb1</b>                       |
| <b>Q05DR6</b>      | <b>9</b>  | <b>3</b>  | <b>46.7</b> | <b>1.06E-13</b> | <b>2.76E-12</b> | <b>11.4</b> | <b>DMT</b> | <b>CTL</b> | <b>Cul1 protein (Fragment) GN=Cul1</b>                                                            |
| D3YTU0             | 2         | 2         | 10.9        | 8.34E-11        | 8.32E-10        | 11.3        | DMT        | CTL        | Vesicle-associated membrane protein 1 GN=Vamp1                                                    |

|                   |           |          |             |                 |                 |             |            |            |                                                                            |
|-------------------|-----------|----------|-------------|-----------------|-----------------|-------------|------------|------------|----------------------------------------------------------------------------|
| <b>E9PXZ7</b>     | <b>15</b> | <b>6</b> | <b>90.8</b> | <b>2.11E-15</b> | <b>9.48E-14</b> | <b>11.1</b> | <b>CTL</b> | <b>DMT</b> | <b>Integrin alpha-D GN=Itgad</b>                                           |
| Q2TBA4            | 6         | 3        | 32.2        | 3.02E-05        | 5.14E-05        | 11.1        | DMT        | CTL        | Bnc2 protein GN=Bnc2                                                       |
| <b>A0A2I3BR72</b> | <b>14</b> | <b>3</b> | <b>105</b>  | <b>9.3E-13</b>  | <b>2.02E-11</b> | <b>11</b>   | <b>CTL</b> | <b>DMT</b> | <b>Roundabout homolog 2 GN=Robo2</b>                                       |
| <b>P70355</b>     | <b>59</b> | <b>2</b> | <b>392</b>  | <b>9.11E-11</b> | <b>8.74E-10</b> | <b>10.9</b> | <b>CTL</b> | <b>DMT</b> | <b>Gag-Pol polyprotein GN=Mela</b>                                         |
| <b>A7XUZ6</b>     | <b>28</b> | <b>2</b> | <b>158</b>  | <b>6.52E-12</b> | <b>9.14E-11</b> | <b>10.9</b> | <b>CTL</b> | <b>DMT</b> | <b>Selection and upkeep of intraepithelial T-cells protein 6 GN=Skint6</b> |
| Q9D2D7            | 3         | 3        | 14.3        | 0.016019        | 0.011303        | 10.9        | CTL        | DMT        | Zinc finger protein 687 GN=Znf687                                          |
| <b>B9EJ54</b>     | <b>26</b> | <b>2</b> | <b>141</b>  | <b>0.000214</b> | <b>0.000276</b> | <b>10.9</b> | <b>DMT</b> | <b>CTL</b> | <b>Nucleoporin 205 GN=Nup205</b>                                           |
| Q148S3            | 2         | 2        | 16.9        | 0.03231         | 0.020511        | 10.8        | DMT        | CTL        | RNA-binding protein NOB1 GN=Nob1                                           |
| <b>Q9CZU6</b>     | <b>22</b> | <b>3</b> | <b>188</b>  | <b>8.81E-11</b> | <b>8.58E-10</b> | <b>10.8</b> | <b>CTL</b> | <b>DMT</b> | <b>Citrate synthase mitochondrial GN=Cs</b>                                |
| Q059Y8            | 4         | 2        | 20.6        | 2.27E-10        | 1.96E-09        | 10.8        | CTL        | DMT        | E3 ubiquitin-protein ligase DCST1 GN=Dcst1                                 |
| <b>B1AXW5</b>     | <b>28</b> | <b>3</b> | <b>280</b>  | <b>0.010465</b> | <b>0.007873</b> | <b>10.7</b> | <b>CTL</b> | <b>DMT</b> | <b>Peroxioredoxin-1 (Fragment) GN=Prdx1</b>                                |
| <b>A0A0R4IZX1</b> | <b>10</b> | <b>2</b> | <b>66.5</b> | <b>0.00019</b>  | <b>0.000247</b> | <b>10.6</b> | <b>CTL</b> | <b>DMT</b> | <b>Differentially-expressed in FDCP 6 GN=Def6</b>                          |
| <b>P62900</b>     | <b>6</b>  | <b>2</b> | <b>58.7</b> | <b>1.57E-05</b> | <b>2.9E-05</b>  | <b>10.5</b> | <b>DMT</b> | <b>CTL</b> | <b>60S ribosomal protein L31 GN=Rpl31</b>                                  |
| Q62460            | 3         | 3        | 16.5        | 5.88E-10        | 4.21E-09        | 10.5        | DMT        | CTL        | (clone BALB3N) GN=Gm20865                                                  |
| <b>Q3UK56</b>     | <b>21</b> | <b>2</b> | <b>201</b>  | <b>1.04E-08</b> | <b>5.05E-08</b> | <b>10.5</b> | <b>DMT</b> | <b>CTL</b> | <b>KH type-2 domain-containing protein GN=Rps3</b>                         |
| <b>Q6ZPY5</b>     | <b>9</b>  | <b>2</b> | <b>64.4</b> | <b>0.021006</b> | <b>0.014206</b> | <b>10.4</b> | <b>DMT</b> | <b>CTL</b> | <b>Zinc finger protein 507 GN=Znf507</b>                                   |
| <b>E9QNV2</b>     | <b>6</b>  | <b>2</b> | <b>47</b>   | <b>1.04E-06</b> | <b>2.73E-06</b> | <b>10.4</b> | <b>DMT</b> | <b>CTL</b> | <b>Mediator of RNA polymerase II transcription subunit 23 GN=Med23</b>     |
| D3Z6X4            | 2         | 2        | 10.9        | 4.19E-05        | 6.83E-05        | 10.4        | DMT        | CTL        | Peroxisomal biogenesis factor 3 GN=Pex3                                    |
| Q8CDU5            | 6         | 3        | 38.2        | 9.45E-09        | 4.7E-08         | 10.2        | DMT        | CTL        | EF-hand domain-containing family member B GN=Efhb                          |
| <b>Q91W86</b>     | <b>9</b>  | <b>3</b> | <b>51</b>   | <b>1.14E-07</b> | <b>3.96E-07</b> | <b>10.2</b> | <b>DMT</b> | <b>CTL</b> | <b>Vacuolar protein sorting-associated protein 11 homolog GN=Vps11</b>     |
| P43688            | 3         | 2        | 16.4        | 0.013657        | 0.009838        | 10.2        | DMT        | CTL        | Homeobox protein Nkx-2.6 GN=Nkx2-6                                         |
| F6UFZ5            | 5         | 3        | 25.7        | 0.002199        | 0.002048        | 10.1        | DMT        | CTL        | PCF11 cleavage and polyadenylation factor subunit (Fragment) GN=Pcf11      |



**Table S5:** Properties of the identified proteins following direct microglia treatment (DMT) in mouse primary neuron (MPN) in comparison with untreated cells. The properties were identified by Progenesis Software after the LC-MS analysis.

| Accession  | Peptides | Unique peptides | Confidence score | Anova (p) | q Value  | Max fold change | Highest Mean | Lowest Mean | Description                                                            |
|------------|----------|-----------------|------------------|-----------|----------|-----------------|--------------|-------------|------------------------------------------------------------------------|
| P63276     | 3        | 1               | 16.5             | 6.18E-10  | 2.50E-07 | $\alpha$        | NOT          | DMT         | 40S ribosomal protein S17 GN=Rps17                                     |
| A0A0R4J288 | 4        | 2               | 34.6             | 6.43E-06  | 0.000371 | 2.95            | DMT          | NOT         | Decapping and exoribonuclease protein GN=Dxo                           |
| E9PUA2     | 6        | 3               | 33.3             | 8.19E-06  | 0.000414 | 2.34            | DMT          | NOT         | Terminal uridylyltransferase 7 GN=Tut7                                 |
| A0A286YE28 | 14       | 1               | 116              | 2.49E-05  | 0.000876 | 1.97            | NOT          | DMT         | Transketolase (Fragment) GN=Tkt                                        |
| E9Q3V9     | 6        | 6               | 26.3             | 3.65E-05  | 0.001053 | 3.9             | NOT          | DMT         | Adhesion G protein-coupled receptor L1 GN=Adgrl1                       |
| A0A5F8MPU7 | 5        | 3               | 29.3             | 4.08E-05  | 0.0011   | 1.81            | DMT          | NOT         | [F-actin]-monooxygenase MICAL3 GN=Mical3                               |
| A0A0R4J0A4 | 4        | 4               | 15.6             | 8.51E-05  | 0.001912 | 10.3            | NOT          | DMT         | Vascular endothelial growth factor receptor 1 GN=Flt1                  |
| Q6ZQ14     | 3        | 3               | 27               | 0.000163  | 0.00275  | 11.4            | DMT          | NOT         | MKIAA0971 protein (Fragment) GN=mKIAA0971                              |
| P97872     | 2        | 2               | 15.6             | 0.000257  | 0.004162 | 32.4            | DMT          | NOT         | Dimethylaniline monooxygenase [N-oxide-forming] 5 GN=Fmo5              |
| Q810Y8     | 6        | 4               | 35               | 0.000443  | 0.006395 | 5.27            | DMT          | NOT         | Preferentially expressed antigen in melanoma-like protein 7 GN=Pramel7 |
| A0A0R4J0F6 | 5        | 4               | 33.5             | 0.000555  | 0.007477 | 2.81            | DMT          | NOT         | Cyclin-G-associated kinase GN=Gak                                      |
| B2RU82     | 4        | 2               | 23.5             | 0.000855  | 0.010518 | 3.85            | DMT          | NOT         | Solute carrier family 30 (Zinc transporter)_member 9 GN=Slc30a9        |
| A2AUM9     | 8        | 4               | 43.4             | 0.001114  | 0.013246 | 2.71            | DMT          | NOT         | Centrosomal protein of 152 kDa GN=Cep152                               |
| A2RTV8     | 3        | 2               | 21.6             | 0.001189  | 0.013736 | 3.4             | DMT          | NOT         | Prorelaxin 1 GN=Rln1                                                   |
| A0A286YCM2 | 3        | 3               | 19.6             | 0.001271  | 0.014274 | 6               | NOT          | DMT         | Heterogeneous nuclear ribonucleoprotein K (Fragment) GN=Hnmpk          |
| Q3URY5     | 3        | 2               | 17.7             | 0.001413  | 0.014738 | 3.49            | NOT          | DMT         | Zinc finger protein 941 GN=Zfp941                                      |
| A2AVR6     | 4        | 2               | 24.7             | 0.00191   | 0.019076 | 5.13            | DMT          | NOT         | Acyl-coenzyme A thioesterase 11 GN=Acot11                              |
| Q3TD08     | 6        | 6               | 32               | 0.001982  | 0.019076 | 2.86            | DMT          | NOT         | Uncharacterized protein GN=Ndrp1                                       |
| Q3U9P7     | 4        | 3               | 29.2             | 0.002041  | 0.019181 | 4.45            | NOT          | DMT         | Succinyl-CoA:3-ketoacid-coenzyme A transferase GN=Oxct1                |
| Q78NA6     | 5        | 3               | 22.3             | 0.002166  | 0.019566 | 2.98            | NOT          | DMT         | V(D)J recombination-activating protein 1 GN=Rag1                       |
| Q69ZK1     | 5        | 3               | 22.5             | 0.002666  | 0.023421 | 2.7             | DMT          | NOT         | MKIAA1413 protein (Fragment) GN=N4bp2                                  |
| P62900     | 2        | 1               | 20.1             | 0.002978  | 0.024101 | 3.65            | NOT          | DMT         | 60S ribosomal protein L31 GN=Rpl31                                     |
| Q7M6X7     | 3        | 2               | 16.4             | 0.003041  | 0.024101 | 1.93            | DMT          | NOT         | Zinc finger protein 457 GN=Zfp457                                      |
| Q3U430     | 4        | 3               | 21.6             | 0.003273  | 0.025437 | 7.92            | DMT          | NOT         | Uncharacterized protein GN=Anapc2                                      |
| F8WIC0     | 5        | 3               | 23.8             | 0.003479  | 0.026535 | 3.76            | DMT          | NOT         | Adenylate kinase 7 GN=Ak7                                              |
| B2RSU7     | 6        | 2               | 44.1             | 0.004193  | 0.030322 | 2.44            | DMT          | NOT         | GRIP and coiled-coil domain containing 2 GN=Gcc2                       |
| S4R257     | 26       | 4               | 259              | 0.004201  | 0.030322 | 1.55            | DMT          | NOT         | Glyceraldehyde-3-phosphate dehydrogenase (Fragment) GN=Gapdh           |
| A2A9K7     | 3        | 2               | 15               | 0.005229  | 0.035822 | 3.72            | DMT          | NOT         | Connector enhancer of kinase suppressor of Ras 1 GN=Cnksr1             |
| P19426     | 19       | 5               | 97.7             | 0.006039  | 0.038778 | 2.62            | DMT          | NOT         | Negative elongation factor E GN=Nelfe                                  |
| P80316     | 8        | 4               | 49.9             | 0.006107  | 0.038778 | 2.14            | NOT          | DMT         | T-complex protein 1 subunit epsilon GN=Cct5                            |
| Q3TST4     | 6        | 4               | 30.4             | 0.006236  | 0.038778 | 3.25            | DMT          | NOT         | G protein-coupled receptor kinase GN=Grk5                              |
| F6ZSB7     | 9        | 3               | 62.7             | 0.006772  | 0.04085  | 2.29            | DMT          | NOT         | D-3-phosphoglycerate dehydrogenase (Fragment) GN=Phgdh                 |
| Q9CSE2     | 2        | 2               | 15.2             | 0.007384  | 0.043341 | 3.17            | DMT          | NOT         | Uncharacterized protein (Fragment) GN=Zfp397                           |
| A0A213BPI0 | 4        | 1               | 21.9             | 0.007465  | 0.043341 | 9.02            | DMT          | NOT         | Coiled-coil domain-containing protein 187 GN=Ccdc187                   |
| F8WI35     | 5        | 5               | 39.8             | 0.007605  | 0.043341 | 1.85            | DMT          | NOT         | Histone H3 GN=H3f3a                                                    |
| O08553     | 7        | 4               | 42               | 0.007613  | 0.043341 | 4.04            | DMT          | NOT         | Dihydropyrimidinase-related protein 2 GN=Dpysl2                        |
| B1ARR7     | 15       | 2               | 188              | 0.009072  | 0.049519 | 1.38            | NOT          | DMT         | Alpha-enolase (Fragment) GN=Eno1                                       |
| G5E8Y1     | 7        | 6               | 35.2             | 0.009434  | 0.049519 | 1.72            | DMT          | NOT         | Zinc finger protein 426 GN=Zfp426                                      |
| Q80Z20     | 4        | 2               | 28.1             | 0.009598  | 0.049738 | 1.52            | DMT          | NOT         | Secreted gel-forming mucin (Fragment)                                  |
| E7CHD7     | 3        | 2               | 17.5             | 0.009869  | 0.050494 | 10.8            | NOT          | DMT         | RPGRIP1 variant-11aa GN=Rpgrip1                                        |
| Q3UV17     | 2        | 2               | 15               | 0.010234  | 0.051065 | 2.92            | NOT          | DMT         | Keratin_type II cytoskeletal 2 oral GN=Krt76                           |

|            |    |    |      |          |          |      |     |     |                                                                                     |
|------------|----|----|------|----------|----------|------|-----|-----|-------------------------------------------------------------------------------------|
| A0A140LI36 | 14 | 13 | 62.3 | 0.010597 | 0.052231 | 1.53 | DMT | NOT | Androglobin GN=Adgb                                                                 |
| P62918     | 5  | 5  | 49.1 | 0.010732 | 0.052263 | 1.92 | DMT | NOT | 60S ribosomal protein L8 GN=Rpl8                                                    |
| B1ASE2     | 4  | 3  | 23.8 | 0.012482 | 0.058663 | 2.46 | DMT | NOT | ATP synthase_H+-transporting_mitochondrial F0 complex_subunit D (Fragment) GN=Atp5h |
| Q3URQ0     | 3  | 3  | 19.9 | 0.012724 | 0.059111 | 2.55 | DMT | NOT | Testis-expressed protein 10 GN=Tex10                                                |
| Q61916     | 3  | 1  | 24.4 | 0.013162 | 0.059773 | 1.5  | DMT | NOT | Mucin (Fragment) GN=Muc5ac                                                          |
| A0A571BEW5 | 3  | 2  | 19.3 | 0.013879 | 0.061478 | 2.94 | DMT | NOT | Lysophosphatidic acid receptor 2 GN=Lpar2                                           |
| B7ZP22     | 11 | 10 | 74.8 | 0.014216 | 0.061478 | 1.41 | DMT | NOT | Heterogeneous nuclear ribonucleoprotein A2/B1 GN=Hnrnpa2b1                          |
| Q3TWE3     | 4  | 2  | 24.3 | 0.01455  | 0.061478 | 5.09 | NOT | DMT | Protein disulfide-isomerase GN=P4hb                                                 |
| A0A1W2P6F6 | 4  | 3  | 31.1 | 0.014586 | 0.061478 | 1.63 | DMT | NOT | Myosin light polypeptide 6 GN=Myl6                                                  |
| Q6DI58     | 4  | 3  | 27.9 | 0.014602 | 0.061478 | 3.48 | NOT | DMT | Rpl12 protein (Fragment) GN=Rpl12                                                   |
| Q3UBS0     | 7  | 5  | 38.8 | 0.015268 | 0.062969 | 2.15 | NOT | DMT | Uncharacterized protein GN=Apoec                                                    |
| C3S7Q5     | 3  | 2  | 17.9 | 0.017038 | 0.068865 | 2.09 | DMT | NOT | Ojoplano variant A GN=Ofcc1                                                         |
| A2ALW2     | 6  | 5  | 32   | 0.018014 | 0.07138  | 3.33 | DMT | NOT | Zinc finger with KRAB and SCAN domains 16 GN=Zkscan16                               |
| Q6P9L6     | 4  | 2  | 25.6 | 0.018714 | 0.072728 | 3.65 | NOT | DMT | Kinesin-like protein KIF15 GN=Kif15                                                 |
| P03995     | 6  | 4  | 44.9 | 0.020878 | 0.077312 | 1.61 | DMT | NOT | Glial fibrillary acidic protein GN=Gfap                                             |
| A0A0A6YWM5 | 4  | 2  | 16.2 | 0.021041 | 0.077312 | 3.06 | DMT | NOT | Rab3 GTPase-activating protein non-catalytic subunit GN=Rab3gap2                    |
| Q571K1     | 7  | 4  | 30   | 0.02129  | 0.077478 | 7.47 | NOT | DMT | MKIAA4151 protein (Fragment) GN=Golgb1                                              |
| P17751     | 11 | 11 | 83.4 | 0.021638 | 0.077478 | 2.2  | NOT | DMT | Triosephosphate isomerase GN=Tpi1                                                   |
| Q4FJT0     | 18 | 9  | 128  | 0.021661 | 0.077478 | 1.68 | DMT | NOT | Matr3 protein GN=Matr3                                                              |
| Q3U741     | 6  | 4  | 33.9 | 0.023329 | 0.081287 | 1.65 | NOT | DMT | Probable ATP-dependent RNA helicase DDX17 GN=Ddx17                                  |
| Q6ZPZ4     | 4  | 2  | 15.5 | 0.024029 | 0.082914 | 3.07 | DMT | NOT | MKIAA1062 protein (Fragment) GN=Abca2                                               |
| P98203     | 3  | 1  | 21.5 | 0.024655 | 0.082914 | 8.23 | DMT | NOT | Armadillo repeat protein deleted in velo-cardio-facial syndrome homolog GN=Arvcf    |
| G3UW90     | 2  | 1  | 20.5 | 0.024814 | 0.082914 | 4.22 | NOT | DMT | Zinc finger transcription factor Trps1 GN=Trps1                                     |
| Z4YJU8     | 5  | 4  | 31.4 | 0.026247 | 0.086248 | 2.56 | DMT | NOT | Golgin subfamily A member 2 (Fragment) GN=Golga2                                    |
| B9EIX2     | 4  | 2  | 26.8 | 0.027392 | 0.089284 | 4.35 | DMT | NOT | AW555464 protein GN=Cep170b                                                         |
| Q91YP3     | 3  | 2  | 22.5 | 0.029202 | 0.092936 | 1.7  | DMT | NOT | Deoxyribose-phosphate aldolase GN=Dera                                              |
| V9GXQ2     | 3  | 2  | 26.9 | 0.029677 | 0.092984 | 2.44 | DMT | NOT | Predicted gene 17087 GN=Gm17087                                                     |
| A0A0R4J036 | 18 | 13 | 105  | 0.032106 | 0.097609 | 2.8  | DMT | NOT | Neurofilament medium polypeptide GN=Nefm                                            |
| A1L340     | 9  | 8  | 49.5 | 0.032336 | 0.097609 | 1.32 | DMT | NOT | Retinitis pigmentosa 1 homolog (Human)-like 1 GN=Rp111                              |
| Q8BK57     | 3  | 2  | 19.9 | 0.032927 | 0.098581 | 4.02 | DMT | NOT | Uncharacterized protein GN=Eif2b2                                                   |
| E9Q3I8     | 14 | 1  | 81.7 | 0.033554 | 0.099721 | 1.54 | DMT | NOT | Intersectin-1 GN=Itsn1                                                              |
| G3X923     | 3  | 1  | 20.2 | 0.034842 | 0.102792 | 22.9 | DMT | NOT | Transmembrane protein 184A GN=Tmem184a                                              |
| P60843     | 3  | 2  | 17.3 | 0.035202 | 0.103101 | 24.9 | NOT | DMT | Eukaryotic initiation factor 4A-I GN=Eif4a1                                         |
| A0A1S6GWJ9 | 2  | 1  | 22.2 | 0.036047 | 0.104228 | 94.4 | DMT | NOT | Elongation factor Ts_mitochondrial GN=Tsfm                                          |
| Q922A0     | 8  | 1  | 71.6 | 0.036102 | 0.104228 | 2.02 | DMT | NOT | Eno2 protein (Fragment) GN=Eno2                                                     |
| Q3TXL0     | 4  | 4  | 22.8 | 0.036968 | 0.105223 | 2.64 | NOT | DMT | Uncharacterized protein (Fragment) GN=Ero11                                         |
| F8WIJ0     | 5  | 3  | 38.9 | 0.037833 | 0.106933 | 1.95 | DMT | NOT | Solute carrier family 12 member 4 GN=Slc12a4                                        |
| A0A1W2P712 | 5  | 5  | 33.8 | 0.040362 | 0.110108 | 1.72 | NOT | DMT | Ral GTPase-activating protein subunit alpha-1 GN=Ralgapa1                           |
| B2RWH3     | 4  | 1  | 43.7 | 0.04043  | 0.110108 | 1.95 | DMT | NOT | Histone H2A GN=Hist2h2aa1                                                           |
| A0A2R8VHP3 | 4  | 2  | 32   | 0.040982 | 0.110108 | 2.72 | NOT | DMT | Predicted pseudogene 5478 GN=Gm5478                                                 |
| Q99LX0     | 7  | 7  | 58.3 | 0.044158 | 0.117369 | 1.36 | NOT | DMT | Protein/nucleic acid deglycase DJ-1 GN=Park7                                        |
| Q8CF78     | 23 | 2  | 289  | 0.044429 | 0.117369 | 1.58 | DMT | NOT | Uncharacterized protein                                                             |
| Q8CGF4     | 4  | 3  | 22.3 | 0.045309 | 0.118153 | 2.59 | NOT | DMT | Sec24 related gene family_member C (S. cerevisiae) GN=Sec24c                        |
| Q66JU1     | 2  | 1  | 16.5 | 0.04531  | 0.118153 | 1.98 | DMT | NOT | Eif3c protein (Fragment) GN=Eif3c                                                   |
| F8VQJ3     | 6  | 4  | 25.9 | 0.04833  | 0.122539 | 2.36 | DMT | NOT | Laminin subunit gamma-1 GN=Lamc1                                                    |
| Q9D6X8     | 2  | 1  | 20.5 | 0.048508 | 0.122539 | 3.66 | DMT | NOT | Zinc finger with KRAB and SCAN domains 14 GN=Zkscan14                               |
| P99024     | 13 | 1  | 108  | 0.049876 | 0.12521  | 2.37 | NOT | DMT | Tubulin beta-5 chain GN=Tubb5                                                       |

**Table S6:** Properties of the identified proteins following direct microglia treatment (DMT) in mouse primary neuron (MPN) in comparison with 3F4 antibody treated cells. The properties were identified by Progenesis Software after the LC-MS analysis.

| Accession  | Peptides | Unique peptides | Confidence score | Anova (p) | q Value  | Max fold change | Highest Mean | Lowest Mean | Description                                                                         |
|------------|----------|-----------------|------------------|-----------|----------|-----------------|--------------|-------------|-------------------------------------------------------------------------------------|
| G3V011     | 7        | 7               | 33.8             | 0.000555  | 0.105665 | 2.48            | 3F4          | DMT         | Unconventional myosin-If GN=Myo1f                                                   |
| Q78NA6     | 5        | 3               | 22.3             | 0.000645  | 0.105665 | 4.79            | 3F4          | DMT         | V(D)J recombination-activating protein 1 GN=Rag1                                    |
| P03995     | 6        | 4               | 44.9             | 0.000789  | 0.105665 | 1.67            | DMT          | 3F4         | Glial fibrillary acidic protein GN=Gfap                                             |
| E9QA15     | 8        | 6               | 41.7             | 0.000895  | 0.105665 | 2.83            | DMT          | 3F4         | Caldesmon 1 GN=Cald1                                                                |
| A1L340     | 9        | 8               | 49.5             | 0.003143  | 0.222686 | 1.52            | DMT          | 3F4         | Retinitis pigmentosa 1 homolog (Human)-like 1 GN=Rp111                              |
| S4R257     | 26       | 4               | 259              | 0.004001  | 0.23649  | 1.4             | DMT          | 3F4         | Glyceraldehyde-3-phosphate dehydrogenase (Fragment) GN=Gapdh                        |
| O08553     | 7        | 4               | 42               | 0.004005  | 0.23649  | 1.4             | DMT          | 3F4         | Dihydropyrimidinase-related protein 2 GN=Dpysl2                                     |
| P62900     | 2        | 1               | 20.1             | 0.00594   | 0.29811  | 4.49            | 3F4          | DMT         | 60S ribosomal protein L31 GN=Rpl31                                                  |
| Q6DI58     | 4        | 3               | 27.9             | 0.006311  | 0.29811  | 4.09            | 3F4          | DMT         | Rpl12 protein (Fragment) GN=Rpl12                                                   |
| Q6PDG0     | 6        | 3               | 23.6             | 0.00859   | 0.35802  | 1.84            | DMT          | 3F4         | Nup205 protein (Fragment) GN=Nup205                                                 |
| Q3U741     | 6        | 4               | 33.9             | 0.009882  | 0.358526 | 1.72            | DMT          | 3F4         | Probable ATP-dependent RNA helicase DDX17 GN=Ddx17                                  |
| Q8K314     | 3        | 2               | 18.3             | 0.00994   | 0.358526 | 1.81            | DMT          | 3F4         | Rab effector MyRIP GN=Myrip                                                         |
| B1ASE2     | 4        | 3               | 23.8             | 0.01087   | 0.358526 | 2.3             | DMT          | 3F4         | ATP synthase_H+-transporting_mitochondrial F0 complex_subunit D (Fragment) GN=Atp5h |
| A0A0R4J1Q0 | 6        | 5               | 37.1             | 0.011197  | 0.358526 | 1.62            | 3F4          | DMT         | Enhancer of mRNA-decapping protein 4 GN=Edc4                                        |
| F6ZSB7     | 9        | 3               | 62.7             | 0.012408  | 0.358526 | 2.09            | DMT          | 3F4         | D-3-phosphoglycerate dehydrogenase (Fragment) GN=Phgdh                              |
| B2RU82     | 4        | 2               | 23.5             | 0.013601  | 0.358526 | 2.25            | DMT          | 3F4         | Solute carrier family 30 (Zinc transporter)_ member 9 GN=Slc30a9                    |
| P62918     | 5        | 5               | 49.1             | 0.013603  | 0.358526 | 1.7             | DMT          | 3F4         | 60S ribosomal protein L8 GN=Rpl8                                                    |
| E9PUA2     | 6        | 3               | 33.3             | 0.013742  | 0.358526 | 1.5             | 3F4          | DMT         | Terminal uridylyltransferase 7 GN=Tu7                                               |
| B1AQX6     | 4        | 2               | 19.2             | 0.014264  | 0.358526 | 2.11            | DMT          | 3F4         | SRC kinase-signaling inhibitor 1 GN=Srcin1                                          |
| A0A1S6GWJ8 | 2        | 1               | 15.3             | 0.015578  | 0.358526 | 3.97            | 3F4          | DMT         | Uncharacterized protein GN=Hnmpm                                                    |
| B1ARR7     | 15       | 2               | 188              | 0.01661   | 0.358526 | 1.35            | DMT          | 3F4         | Alpha-enolase (Fragment) GN=Eno1                                                    |
| G3UZR1     | 4        | 1               | 41.2             | 0.017732  | 0.358526 | 12.7            | 3F4          | DMT         | Tubulin beta-5 chain (Fragment) GN=Tubb5                                            |
| Q8BML7     | 3        | 2               | 17.5             | 0.018228  | 0.358526 | 1.91            | DMT          | 3F4         | Poly [ADP-ribose] polymerase (Fragment) GN=Parp11                                   |
| D3YTR0     | 4        | 3               | 20.9             | 0.01895   | 0.358526 | 3.48            | DMT          | 3F4         | Adenomatous polyposis coli protein 2 GN=Apc2                                        |
| P62082     | 5        | 5               | 39.4             | 0.019383  | 0.358526 | 1.4             | 3F4          | DMT         | 40S ribosomal protein S7 GN=Rps7                                                    |
| Q8CH65     | 9        | 2               | 56.8             | 0.020113  | 0.358526 | 8.92            | DMT          | 3F4         | BIRC1E protein GN=Naip5                                                             |
| Q920P5     | 3        | 3               | 17.2             | 0.020241  | 0.358526 | 7.65            | DMT          | 3F4         | Adenylate kinase isoenzyme 5 GN=Ak5                                                 |
| A0A140LI36 | 14       | 13              | 62.3             | 0.020881  | 0.360836 | 1.56            | DMT          | 3F4         | Androglobin GN=Adgb                                                                 |
| F6XAI7     | 2        | 1               | 15.2             | 0.022444  | 0.369804 | 2.72            | 3F4          | DMT         | EF-hand calcium-binding domain-containing protein 7 GN=Efcab7                       |
| Q546G4     | 29       | 26              | 194              | 0.023819  | 0.374875 | 2.29            | DMT          | 3F4         | Serum albumin GN=Alb                                                                |
| P16045     | 3        | 3               | 20               | 0.027397  | 0.398896 | 2.06            | DMT          | 3F4         | Galectin-1 GN=Lgals1                                                                |
| P15331     | 8        | 1               | 74.7             | 0.029486  | 0.398896 | 1.98            | 3F4          | DMT         | Peripherin GN=Prph                                                                  |
| P31001     | 5        | 2               | 33.1             | 0.029545  | 0.398896 | 1.79            | 3F4          | DMT         | Desmin GN=Des                                                                       |
| Q8K441     | 6        | 5               | 29.6             | 0.03046   | 0.398896 | 1.74            | 3F4          | DMT         | ATP-binding cassette sub-family A member 6 GN=Abca6                                 |
| E7CHD7     | 3        | 2               | 17.5             | 0.030525  | 0.398896 | 3.88            | 3F4          | DMT         | RPGRIP1 variant-11aa GN=Rpgrip1                                                     |
| A0A087WRB8 | 7        | 7               | 41.9             | 0.030817  | 0.398896 | 2.38            | 3F4          | DMT         | Dystonin (Fragment) GN=Dst                                                          |
| B2RSU7     | 6        | 2               | 44.1             | 0.031281  | 0.398896 | 1.79            | DMT          | 3F4         | GRIP and coiled-coil domain containing 2 GN=Gcc2                                    |
| Q91YP3     | 3        | 2               | 22.5             | 0.032947  | 0.398896 | 1.58            | DMT          | 3F4         | Deoxyribose-phosphate aldolase GN=Dera                                              |
| F8VQJ3     | 6        | 4               | 25.9             | 0.035355  | 0.398896 | 2.31            | DMT          | 3F4         | Laminin subunit gamma-1 GN=Lamc1                                                    |
| E9PWX1     | 4        | 2               | 18.6             | 0.03539   | 0.398896 | 1.65            | DMT          | 3F4         | Dipeptidyl aminopeptidase-like protein 6 GN=Dpp6                                    |
| Q3UBS0     | 7        | 5               | 38.8             | 0.03547   | 0.398896 | 2.23            | 3F4          | DMT         | Uncharacterized protein GN=Apoe                                                     |
| Q5FW97     | 40       | 15              | 472              | 0.039998  | 0.435986 | 1.28            | DMT          | 3F4         | Enolase 1_alpha non-neuron GN=EG433182                                              |
| O70291     | 3        | 1               | 19.1             | 0.040921  | 0.438885 | 2.12            | DMT          | 3F4         | G protein-coupled receptor kinase 4 GN=Grk4                                         |
| E9Q9E7     | 5        | 5               | 35               | 0.041503  | 0.438885 | 1.7             | DMT          | 3F4         | Centriolin GN=Cntrl                                                                 |

|                |    |   |      |          |          |      |     |     |                                                     |
|----------------|----|---|------|----------|----------|------|-----|-----|-----------------------------------------------------|
| A0A286YE2<br>8 | 14 | 1 | 116  | 0.042689 | 0.444593 | 1.2  | 3F4 | DMT | Transketolase (Fragment) GN=Tkt                     |
| A0A5F8MPU<br>7 | 5  | 3 | 29.3 | 0.045117 | 0.444593 | 1.46 | DMT | 3F4 | [F-actin]-monooxygenase MICAL3 GN=Mical3            |
| Q3UZK5         | 3  | 2 | 19.9 | 0.045181 | 0.444593 | 1.3  | DMT | 3F4 | Uncharacterized protein (Fragment) GN=Akap13        |
| A2AFS0         | 4  | 3 | 24.1 | 0.048723 | 0.451406 | 1.57 | 3F4 | DMT | Serine--tRNA ligase_ cytoplasmic (Fragment) GN=Sars |
| Z4YJU8         | 5  | 4 | 31.4 | 0.049059 | 0.451406 | 2.25 | DMT | 3F4 | Golgin subfamily A member 2 (Fragment) GN=Golga2    |

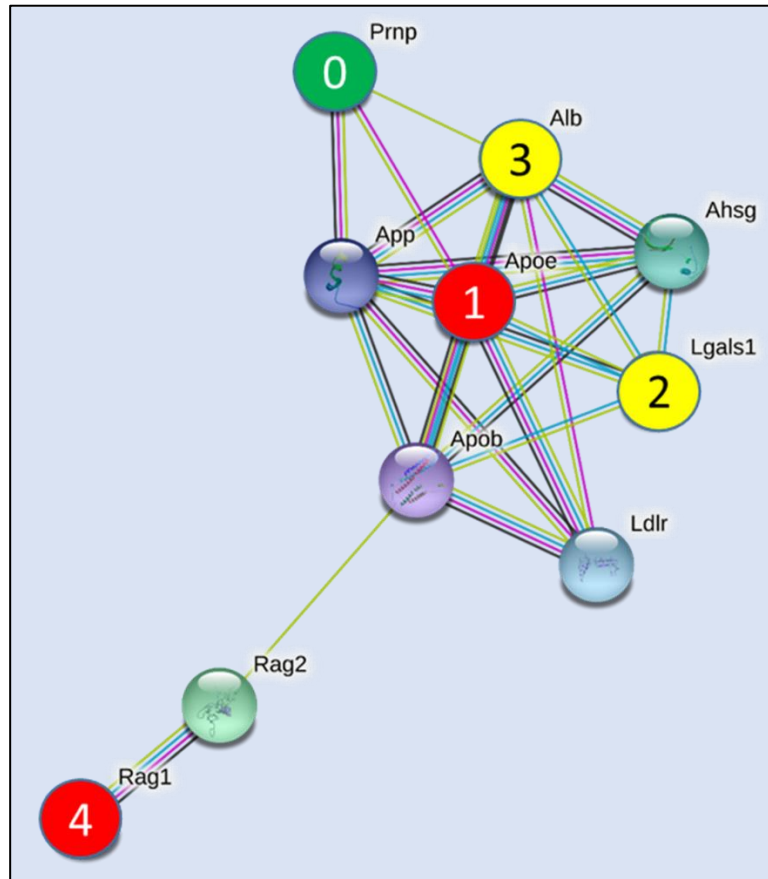

**Figure S3:** Protein-protein interaction of the identified 4 allergenic genes following direct microglia treatment (DMT) from mouse primary neuron (MPN) in comparison with 3F4 antibody treated cells. Protein-protein interaction analysis was performed using STRING v11.0 server. The *Mus Musculus* database was used as the host organism for the identification of protein interactions. Interaction among the allergenic proteins (numbered 1, 2, 3 & 4) and with PrP<sup>C</sup> (numbered 0) following direct antibody treatment, where red and yellow color indicate the downregulated and upregulated genes, respectively and green color represents the cellular prion protein PrP<sup>C</sup>.

**Table S7:** Properties of the identified proteins following direct antibody treatment to microglia (N11) (Control). The properties were identified by Progenesis Software after the LC-MS analysis.

| Accession  | Peptides | Unique peptides | Confidence score | Anova (p) | q Value  | Max fold change | Highest Mean | Lowest Mean | Description                                                   |
|------------|----------|-----------------|------------------|-----------|----------|-----------------|--------------|-------------|---------------------------------------------------------------|
| A0A1D5RLV4 | 2        | 1               | 8.76             | 2.30E-05  | 0.004956 | 37.6            | AMT          | CTL         | Golgin subfamily A member 4 (Fragment)<br>GN=Golga4           |
| A2A7F4     | 2        | 1               | 8.51             | 0.00108   | 0.035277 | 2.07E+03        | AMT          | CTL         | Rearranged L-myc fusion sequence GN=Rlf                       |
| D3Z2W9     | 1        | 1               | 4.23             | 0.022037  | 0.126289 | 479             | AMT          | CTL         | Cancer-related nucleoside-triphosphatase homolog GN=Ntpr      |
| E0CXC1     | 1        | 1               | 5.24             | 0.044922  | 0.182062 | 557             | AMT          | CTL         | Cilia- and flagella-associated protein 206<br>GN=Cfap206      |
| E0CZ22     | 2        | 1               | 10               | 1.82E-06  | 0.000874 | 32.2            | AMT          | CTL         | Maestro heat-like repeat family member 1<br>GN=Mroh1          |
| F6TY75     | 1        | 1               | 5.14             | 0.000859  | 0.032464 | 16.8            | AMT          | CTL         | RNA-binding protein MEX3D (Fragment)<br>GN=Mex3d              |
| G3X931     | 2        | 1               | 9.32             | 0.001436  | 0.039667 | 20.8            | AMT          | CTL         | Vomer nasal 2_ receptor 65 GN=Vmn2r65                         |
| G3XA59     | 1        | 1               | 4.58             | 0.019323  | 0.116306 | 19.2            | AMT          | CTL         | Transforming growth factor beta activator<br>LRRC32 GN=Lrrc32 |
| O35189     | 1        | 1               | 3.89             | 0.003149  | 0.055945 | 13.2            | AMT          | CTL         | Putative pheromone receptor GN=Vmn2r123                       |
| Q3U9U7     | 1        | 1               | 5.28             | 0.01236   | 0.088464 | 38.2            | AMT          | CTL         | PSI domain-containing protein GN=Pttg1ip                      |
| Q3U430     | 1        | 1               | 4.69             | 0.005872  | 0.065473 | $\alpha$        | AMT          | CTL         | Uncharacterized protein GN=Anapc2                             |
| Q4FJL2     | 1        | 1               | 4.13             | 0.000333  | 0.022436 | 153             | AMT          | CTL         | Reticulon GN=Rtn1                                             |
| Q5SQP1     | 2        | 1               | 9.63             | 0.013297  | 0.092428 | $\alpha$        | AMT          | CTL         | HORMA domain-containing protein 2<br>GN=Hormad2               |
| Q9CWK0     | 2        | 1               | 14.6             | 0.017752  | 0.110557 | 21.8            | AMT          | CTL         | Ribosomal_L14e domain-containing protein<br>GN=Rpl14          |

**Table S8:** Properties of the identified proteins following indirect microglia treatment (IMT). The properties were identified by Progenesis Software after the LC-MS analysis. Selected 11 proteins have been highlighted as bold.

| Accession         | Peptides  | Unique peptides | Confidence score | Anova (p)       | q Value         | Max fold change | Highest Mean | Lowest Mean | Description                                                                                                             |
|-------------------|-----------|-----------------|------------------|-----------------|-----------------|-----------------|--------------|-------------|-------------------------------------------------------------------------------------------------------------------------|
| Q61833            | 9         | 1               | 58.5             | 0.001248        | 0.099667        | $\alpha$        | IMT          | CTRL        | Dolichyl-diphosphooligosaccharide--protein glycosyltransferase subunit 2 GN=Rpn2                                        |
| Q80XI6            | 7         | 1               | 38.5             | 0.014107        | 0.356679        | $\alpha$        | IMT          | CTRL        | Mitogen-activated protein kinase kinase kinase 11 GN=Map3k11                                                            |
| Q69ZL7            | 3         | 1               | 18.2             | 0.005196        | 0.229812        | $\alpha$        | CTRL         | IMT         | MKIAA1336 protein (Fragment) GN=Wdr35                                                                                   |
| Q32P04            | 18        | 1               | 156              | 0               | 0               | $\alpha$        | CTRL         | IMT         | Keratin 5 GN=Krt5                                                                                                       |
| Q14CH7            | 3         | 1               | 22.1             | 0.012012        | 0.340111        | $\alpha$        | IMT          | CTRL        | Alanine--tRNA ligase_mitochondrial GN=Aars2                                                                             |
| Q8K025            | 1         | 1               | 5.36             | 0.018876        | 0.398448        | $\alpha$        | IMT          | CTRL        | GSK-3-binding protein FRAT2 GN=Frat2                                                                                    |
| Q8BJY1            | 3         | 1               | 16.7             | 0.005196        | 0.229812        | $\alpha$        | CTRL         | IMT         | 26S proteasome non-ATPase regulatory subunit 5 GN=Psm5                                                                  |
| Q3U0N4            | 2         | 1               | 11.7             | 0.002914        | 0.166647        | $\alpha$        | IMT          | CTRL        | Uncharacterized protein GN=Taf1c                                                                                        |
| G3X9I7            | 10        | 1               | 56.7             | 4.86E-06        | 0.003027        | $\alpha$        | IMT          | CTRL        | Zinc finger CCCH-type-containing 12B GN=Zc3h12b                                                                         |
| E9PY14            | 7         | 1               | 36.5             | 0.048028        | 0.567103        | $\alpha$        | IMT          | CTRL        | Centromere protein F (Fragment) GN=Cenpf                                                                                |
| E9PXG7            | 1         | 1               | 5.78             | 0.043181        | 0.546739        | $\alpha$        | IMT          | CTRL        | 3 beta-hydroxysteroid dehydrogenase/Delta 5-->4-isomerase type 3 GN=Hsd3b3                                              |
| E9PX52            | 2         | 1               | 18.1             | 1.05E-05        | 0.003871        | $\alpha$        | IMT          | CTRL        | Arf-GAP with SH3 domain_ ANK repeat and PH domain-containing protein 2 GN=Asap2                                         |
| A2AUR3            | 3         | 1               | 14.3             | 0.010806        | 0.323802        | $\alpha$        | IMT          | CTRL        | Phosphotriesterase-related protein (Fragment) GN=Pter                                                                   |
| A2AM95            | 1         | 1               | 5.31             | 0.001633        | 0.123143        | $\alpha$        | IMT          | CTRL        | Emerin GN=Emd                                                                                                           |
| A2AJY2            | 1         | 1               | 4.03             | 0.001149        | 0.099291        | $\alpha$        | IMT          | CTRL        | Collagen alpha-1(XV) chain GN=Col15a1                                                                                   |
| <b>A0A571BEC4</b> | <b>14</b> | <b>3</b>        | <b>96.5</b>      | <b>0.001168</b> | <b>0.099291</b> | $\alpha$        | <b>IMT</b>   | <b>CTRL</b> | <b>Ligand-dependent nuclear receptor corepressor-like protein GN=Lcor1</b>                                              |
| A0A3Q4EH09        | 1         | 1               | 4.41             | 0.03379         | 0.498196        | $\alpha$        | IMT          | CTRL        | Vomer nasal type-2 receptor 116 GN=Vmn2r116                                                                             |
| <b>A0A0N4SVP8</b> | <b>25</b> | <b>2</b>        | <b>214</b>       | <b>4.16E-06</b> | <b>0.003027</b> | $\alpha$        | <b>CTRL</b>  | <b>IMT</b>  | <b>Eukaryotic translation initiation factor 4A3-like 2 GN=Ef4a312</b>                                                   |
| Q8BM39            | 1         | 1               | 4.61             | 0.013411        | 0.350838        | 27500           | IMT          | CTRL        | Pre-mRNA-splicing factor 18 GN=Prpf18                                                                                   |
| A0A1Y7VKF5        | 1         | 1               | 5.75             | 0.048501        | 0.568532        | 1850            | IMT          | CTRL        | 39S ribosomal protein L32_mitochondrial GN=Mrrp132                                                                      |
| A0A0R4J1V6        | 4         | 1               | 25.6             | 0.037645        | 0.522518        | 1040            | IMT          | CTRL        | Homeodomain-interacting protein kinase 1 GN=Hipk1                                                                       |
| A0A338P6P0        | 2         | 1               | 17.6             | 0.000949        | 0.095376        | 900             | IMT          | CTRL        | Leucine-zipper-like transcriptional regulator 1 GN=Lztr1                                                                |
| Q3UZI3            | 48        | 1               | 336              | 0.025147        | 0.432245        | 523             | CTRL         | IMT         | Staphylococcal nuclease domain-containing protein GN=Snd1                                                               |
| B2RUB8            | 2         | 1               | 10.1             | 2.64E-08        | 4.37E-05        | 272             | CTRL         | IMT         | Homeo box C6 GN=Hoxc6                                                                                                   |
| Q9CRB2            | 4         | 1               | 35               | 0.000355        | 0.05119         | 219             | IMT          | CTRL        | H/ACA ribonucleoprotein complex subunit 2 GN=Nhp2                                                                       |
| A2AH85            | 31        | 1               | 205              | 0.024779        | 0.430826        | 198             | IMT          | CTRL        | 116 kDa U5 small nuclear ribonucleoprotein component GN=Eftud2                                                          |
| <b>A0A1W2P711</b> | <b>8</b>  | <b>2</b>        | <b>45.6</b>      | <b>7.67E-05</b> | <b>0.019583</b> | <b>148</b>      | <b>IMT</b>   | <b>CTRL</b> | <b>Melanoma inhibitory activity protein 2 GN=Mia2</b>                                                                   |
| B1AW75            | 3         | 1               | 15               | 0.00483         | 0.219487        | 139             | IMT          | CTRL        | Fanconi anemia group B protein homolog GN=Fancb                                                                         |
| J3QN85            | 4         | 1               | 19.3             | 0.003099        | 0.174245        | 134             | IMT          | CTRL        | Fibroblast growth factor receptor GN=Fgfr1                                                                              |
| P19324            | 3         | 1               | 16.5             | 0.020744        | 0.40704         | 97.3            | IMT          | CTRL        | Serpin H1 GN=Serpinh1                                                                                                   |
| H3BLP7            | 12        | 1               | 117              | 0.032229        | 0.492698        | 59.6            | CTRL         | IMT         | Heterogeneous nuclear ribonucleoprotein K (Fragment) GN=Hnrmpk                                                          |
| Q8K0D0            | 3         | 1               | 15               | 0.012262        | 0.340111        | 55.3            | IMT          | CTRL        | Cyclin-dependent kinase 17 GN=Cdk17                                                                                     |
| <b>Q8BW41</b>     | <b>5</b>  | <b>3</b>        | <b>26.1</b>      | <b>0.011797</b> | <b>0.340111</b> | <b>49.1</b>     | <b>IMT</b>   | <b>CTRL</b> | <b>Protein O-linked-mannose beta-1_4-N-acetylglucosaminyltransferase 2 GN=Pomgnt2</b>                                   |
| <b>A2A863</b>     | <b>6</b>  | <b>3</b>        | <b>33.6</b>      | <b>0.033583</b> | <b>0.497715</b> | <b>45</b>       | <b>IMT</b>   | <b>CTRL</b> | <b>Integrin beta-4 GN=Itgb4</b>                                                                                         |
| B7ZN94            | 1         | 1               | 4.8              | 0.041863        | 0.542228        | 43.1            | IMT          | CTRL        | Fbxw14 protein GN=Fbxw14                                                                                                |
| A0A0A0MQ88        | 2         | 1               | 12.1             | 0.019122        | 0.398448        | 34              | IMT          | CTRL        | Cytoplasmic phosphatidylinositol transfer protein 1 GN=Ptppnc1                                                          |
| B7ZP28            | 11        | 1               | 76.6             | 0.041194        | 0.542228        | 33.5            | IMT          | CTRL        | Dennd2a protein GN=Dennd2a                                                                                              |
| <b>Q8BNG3</b>     | <b>4</b>  | <b>2</b>        | <b>13.7</b>      | <b>0.001197</b> | <b>0.099291</b> | <b>31.3</b>     | <b>IMT</b>   | <b>CTRL</b> | <b>Kinesin-like protein GN=Kif6</b>                                                                                     |
| A0A0U1RQ14        | 3         | 1               | 14.5             | 0.003354        | 0.185432        | 28.8            | IMT          | CTRL        | MICOS complex subunit MIC60 (Fragment) GN=Immt                                                                          |
| M0QWN7            | 4         | 1               | 26.3             | 0.002478        | 0.15224         | 25.5            | IMT          | CTRL        | Ubiquitin-specific peptidase 35 GN=Usp35                                                                                |
| D3Z5M8            | 6         | 1               | 37.1             | 0.001155        | 0.099291        | 24.4            | CTRL         | IMT         | Fibroblast growth factor receptor 2 (Fragment) GN=Fgfr2                                                                 |
| B7ZND5            | 4         | 1               | 23.2             | 0.001884        | 0.134404        | 22.6            | IMT          | CTRL        | P2X purinoceptor GN=P2rx5                                                                                               |
| Q3TTV6            | 2         | 1               | 10.3             | 8.32E-06        | 0.00345         | 21.8            | CTRL         | IMT         | Tuftelin-interacting protein 11 GN=Tfip11                                                                               |
| <b>A2AST1</b>     | <b>17</b> | <b>6</b>        | <b>110</b>       | <b>0.000258</b> | <b>0.040724</b> | <b>20.8</b>     | <b>IMT</b>   | <b>CTRL</b> | <b>Coiled-coil domain-containing 141 GN=Ccdc141</b>                                                                     |
| E9PWW9            | 14        | 1               | 81.9             | 0.012912        | 0.345427        | 19.2            | IMT          | CTRL        | Remodeling and spacing factor 1 GN=Rsf1                                                                                 |
| Q04692            | 4         | 1               | 21.6             | 0.001971        | 0.134404        | 17.5            | CTRL         | IMT         | SWI/SNF-related matrix-associated actin-dependent regulator of chromatin subfamily A containing DEAD/H box 1 GN=Smarca1 |

|                   |           |          |             |                 |                 |             |             |             |                                                                          |
|-------------------|-----------|----------|-------------|-----------------|-----------------|-------------|-------------|-------------|--------------------------------------------------------------------------|
| <b>E9QNV2</b>     | <b>6</b>  | <b>2</b> | <b>47</b>   | <b>0.003956</b> | <b>0.199185</b> | <b>17.4</b> | <b>IMT</b>  | <b>CTRL</b> | <b>Mediator of RNA polymerase II transcription subunit 23 GN=Med23</b>   |
| A0A1S6GW17        | 1         | 1        | 5.43        | 0.006758        | 0.261819        | 16.7        | IMT         | CTRL        | Uncharacterized protein GN=Bud23                                         |
| <b>Q9R1L5</b>     | <b>3</b>  | <b>2</b> | <b>13</b>   | <b>0.008717</b> | <b>0.301232</b> | <b>16.3</b> | <b>IMT</b>  | <b>CTRL</b> | <b>Microtubule-associated serine/threonine-protein kinase 1 GN=Mast1</b> |
| Q14B48            | 6         | 1        | 39          | 0.006859        | 0.261819        | 16          | IMT         | CTRL        | Protein ITPRID1 GN=Itpri1                                                |
| D3YUH8            | 3         | 1        | 16.1        | 6.39E-06        | 0.003027        | 15.3        | IMT         | CTRL        | Rho GTPase-activating protein 20 GN=Arhgap20                             |
| A0A1Y7VM45        | 2         | 1        | 15.7        | 0.024742        | 0.430826        | 14.4        | CTRL        | IMT         | Pre-mRNA-processing factor 39 (Fragment) GN=Prpf39                       |
| O88194            | 9         | 1        | 55.7        | 0.011473        | 0.336812        | 14.3        | IMT         | CTRL        | Cadherin-related neural receptor 7 (Fragment) GN=CNR7                    |
| B9EIC2            | 3         | 1        | 15.7        | 0.03507         | 0.503642        | 13.6        | IMT         | CTRL        | Nlrp4e protein GN=Nlrp4e                                                 |
| A0A1B0GQZ1        | 2         | 1        | 9.92        | 0.013934        | 0.356679        | 13.5        | CTRL        | IMT         | 39S ribosomal protein L23_mitochondrial GN=Mrpl23                        |
| C9K101            | 4         | 1        | 22          | 0.00024         | 0.039835        | 13.4        | IMT         | CTRL        | Non-specific serine/threonine protein kinase GN=Mark1                    |
| Q3TSQ8            | 2         | 1        | 11.8        | 0.01483         | 0.356679        | 13.2        | CTRL        | IMT         | Uncharacterized protein (Fragment) GN=Bcan                               |
| Q9JI78            | 4         | 1        | 20.9        | 0.011935        | 0.340111        | 13.2        | CTRL        | IMT         | Peptide-N(4)-(N-acetyl-beta-glucosaminyl)asparagine amidase GN=Ngly1     |
| A2ATY4            | 2         | 1        | 16          | 2.59E-05        | 0.007511        | 12.9        | IMT         | CTRL        | Zinc finger and BTB domain-containing 34 GN=Zbtb34                       |
| <b>A0A0R4J0F6</b> | <b>24</b> | <b>9</b> | <b>171</b>  | <b>0.002895</b> | <b>0.166647</b> | <b>12.3</b> | <b>IMT</b>  | <b>CTRL</b> | <b>Cyclin-G-associated kinase GN=Gak</b>                                 |
| A2A9K7            | 7         | 1        | 46.1        | 0.018134        | 0.393185        | 12          | CTRL        | IMT         | Connector enhancer of kinase suppressor of Ras 1 GN=Cnksr1               |
| O35074            | 1         | 1        | 5.25        | 0.02759         | 0.459298        | 11.9        | IMT         | CTRL        | Prostacyclin synthase GN=Ptgis                                           |
| A0A1W2P7C0        | 6         | 1        | 34.5        | 0.026873        | 0.450243        | 11.7        | CTRL        | IMT         | Utrophin GN=Utrn                                                         |
| A0A0G2JE49        | 1         | 1        | 5.36        | 0.020849        | 0.40704         | 11.5        | IMT         | CTRL        | Paired immunoglobulin-like type 2 receptor alpha (Fragment) GN=Pilra     |
| Q9DA97            | 4         | 1        | 19.7        | 0.003799        | 0.199185        | 11.3        | CTRL        | IMT         | Septin-14 GN=Sept14                                                      |
| <b>D3YVV0</b>     | <b>5</b>  | <b>2</b> | <b>29.4</b> | <b>0.008072</b> | <b>0.289623</b> | <b>11.3</b> | <b>CTRL</b> | <b>IMT</b>  | <b>Tetratricopeptide repeat domain 13 GN=Ttc13</b>                       |
| Q8BIM8            | 8         | 1        | 64.1        | 0.001603        | 0.123143        | 10.8        | CTRL        | IMT         | Uncharacterized protein GN=Myh9                                          |
| Q9WVM1            | 3         | 1        | 17.2        | 0.024629        | 0.430826        | 10.7        | CTRL        | IMT         | Rac GTPase-activating protein 1 GN=Racgap1                               |
| G5E867            | 7         | 1        | 37.9        | 3.1E-07         | 0.000343        | 10.7        | IMT         | CTRL        | Ras association (RalGDS/AF-6) and pleckstrin homology domains 1 GN=Raph1 |
| A0A0G2JGU6        | 1         | 1        | 5.5         | 0.000192        | 0.033551        | 10.7        | IMT         | CTRL        | T cell receptor alpha variable 15N-1 (Fragment) GN=Trav15n-1             |
| Q6PGF5            | 3         | 1        | 15.7        | 0.019218        | 0.398448        | 10.6        | CTRL        | IMT         | BMS1 homolog_ ribosome assembly protein (Yeast) GN=Bms1                  |
| Q9R1S7            | 2         | 1        | 9.37        | 0.032044        | 0.492698        | 10.4        | CTRL        | IMT         | Multidrug resistance-associated protein 6 GN=Abcc6                       |
| A0A1L1SQR4        | 6         | 1        | 37          | 0.03148         | 0.492698        | 10.3        | IMT         | CTRL        | Dedicator of cytokinesis protein 6 GN=Dock6                              |
| Q3TX47            | 66        | 1        | 761         | 0.009966        | 0.315236        | 10.2        | CTRL        | IMT         | Tr-type G domain-containing protein GN=Eef2                              |
| Q05BH6            | 21        | 1        | 125         | 0.02386         | 0.427858        | 10.1        | IMT         | CTRL        | Tcof1 protein (Fragment) GN=Tcof1                                        |



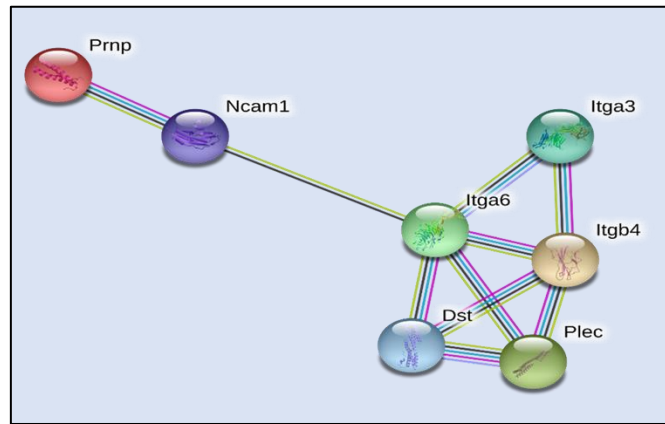

**Figure S4:** Protein-protein interaction and Classification of the identified allergenic gene following indirect microglial treatment (IMT). Protein-protein interaction analysis was performed using STRING v11.0 server. The *Mus Musculus* database was used as the host organism for the identification of protein interactions. Interaction among the allergenic protein (ITGB4) and PrP<sup>C</sup> following indirect microglial treatment.

**Table S9:** Protein list identified following analysis of the 50 kDa band corresponding to FcεR1a using liquid-chromatography-mass spectrometry. Green color indicates the allergy related proteins identified by AllerGAtlas database.

|                   |                                                                                                                |
|-------------------|----------------------------------------------------------------------------------------------------------------|
| P05213            | Tubulin alpha-1B chain OS=Mus musculus OX=10090 GN=Tuba1b PE=1 SV=2                                            |
| H9KV07            | Nephrocystin-3 OS=Mus musculus OX=10090 GN=Nphp3 PE=1 SV=2                                                     |
| Q53D70            | ZFP28 (Fragment) OS=Mus musculus OX=10090 GN=Zfp28 PE=2 SV=1                                                   |
| Q641M0            | Uncharacterized protein OS=Mus musculus OX=10090 GN=2610008E11Rik PE=2 SV=1                                    |
| F7APL9            | Zinc finger protein 872 OS=Mus musculus OX=10090 GN=Zfp872 PE=4 SV=1                                           |
| E9PZ68            | Zinc finger protein 788 OS=Mus musculus OX=10090 GN=Zfp788 PE=4 SV=1                                           |
| Q3URY5            | Zinc finger protein 941 OS=Mus musculus OX=10090 GN=Zfp941 PE=1 SV=1                                           |
| Q3V232            | Uncharacterized protein OS=Mus musculus OX=10090 GN=Zfp867 PE=2 SV=1                                           |
| G3X9T2            | Zinc finger protein 619 OS=Mus musculus OX=10090 GN=Zfp619 PE=4 SV=1                                           |
| <b>A0A3B2W7W2</b> | <b>Peroxisome proliferator-activated receptor delta OS=Mus musculus OX=10090 GN=Ppard PE=1 SV=1</b>            |
| Q6A022            | MKIAA0668 protein (Fragment) OS=Mus musculus OX=10090 GN=mKIAA0668 PE=4 SV=1                                   |
| Q9JL35            | High mobility group nucleosome-binding domain-containing protein 5 OS=Mus musculus OX=10090 GN=Hmgn5 PE=1 SV=2 |
